# Supplementary material for: Protocol for a scoping review on rehabilitation among individuals who experience homelessness and traumatic brain injury
Source: PubMed Central journal article supplement — BMJ Open. 2021 Nov 5;11(11):e052942. doi: 10.1136/bmjopen-2021-052942 (PMC8573664; doi:10.1136/bmjopen-2021-052942), 2021-11-05
Supplement: bmjopen-2021-052942.draft_revisions.pdf [file bmjopen-2021-052942.draft_revisions.pdf]

# BMJ Open

BMJ Open is committed to open peer review. As part of this commitment we make the peer review history of every article we publish publicly available.

When an article is published we post the peer reviewers' comments and the authors' responses online. We also post the versions of the paper that were used during peer review. These are the versions that the peer review comments apply to.

The versions of the paper that follow are the versions that were submitted during the peer review process. They are not the versions of record or the final published versions. They should not be cited or distributed as the published version of this manuscript.

BMJ Open is an open access journal and the full, final, typeset and author-corrected version of record of the manuscript is available on our site with no access controls, subscription charges or pay-per-view fees (<http://bmjopen.bmj.com>).

If you have any questions on BMJ Open's open peer review process please email [info.bmjopen@bmj.com](mailto:info.bmjopen@bmj.com)

# BMJ Open

## Protocol for a scoping review on rehabilitation among individuals who experience homelessness and traumatic brain injury

|                               |                                                                                                                                                                                                                                                                                                                                                                                                                      |
|-------------------------------|----------------------------------------------------------------------------------------------------------------------------------------------------------------------------------------------------------------------------------------------------------------------------------------------------------------------------------------------------------------------------------------------------------------------|
| Journal:                      | <i>BMJ Open</i>                                                                                                                                                                                                                                                                                                                                                                                                      |
| Manuscript ID                 | bmjopen-2021-052942                                                                                                                                                                                                                                                                                                                                                                                                  |
| Article Type:                 | Protocol                                                                                                                                                                                                                                                                                                                                                                                                             |
| Date Submitted by the Author: | 01-May-2021                                                                                                                                                                                                                                                                                                                                                                                                          |
| Complete List of Authors:     | Chan, Vincy; Toronto Rehabilitation Institute, KITE; University of Toronto, Rehabilitation Sciences Institute<br>Estrella, Maria Jennifer; University of Toronto, Department of Occupational Science & Occupational Therapy<br>Babineau, Jessica; Toronto Rehabilitation Institute, Research<br>Colantonio, Angela; University of Toronto, Rehabilitation Science Institute ; Toronto Rehabilitation Institute, KITE |
| Keywords:                     | PUBLIC HEALTH, REHABILITATION MEDICINE, TRAUMA MANAGEMENT                                                                                                                                                                                                                                                                                                                                                            |
|                               |                                                                                                                                                                                                                                                                                                                                                                                                                      |

SCHOLARONE™  
Manuscripts

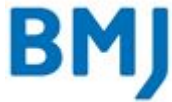

I, the Submitting Author has the right to grant and does grant on behalf of all authors of the Work (as defined in the below author licence), an exclusive licence and/or a non-exclusive licence for contributions from authors who are: i) UK Crown employees; ii) where BMJ has agreed a CC-BY licence shall apply, and/or iii) in accordance with the terms applicable for US Federal Government officers or employees acting as part of their official duties; on a worldwide, perpetual, irrevocable, royalty-free basis to BMJ Publishing Group Ltd ("BMJ") its licensees and where the relevant Journal is co-owned by BMJ to the co-owners of the Journal, to publish the Work in this journal and any other BMJ products and to exploit all rights, as set out in our [licence](#).

The Submitting Author accepts and understands that any supply made under these terms is made by BMJ to the Submitting Author unless you are acting as an employee on behalf of your employer or a postgraduate student of an affiliated institution which is paying any applicable article publishing charge ("APC") for Open Access articles. Where the Submitting Author wishes to make the Work available on an Open Access basis (and intends to pay the relevant APC), the terms of reuse of such Open Access shall be governed by a Creative Commons licence – details of these licences and which [Creative Commons](#) licence will apply to this Work are set out in our licence referred to above.

Other than as permitted in any relevant BMJ Author's Self Archiving Policies, I confirm this Work has not been accepted for publication elsewhere, is not being considered for publication elsewhere and does not duplicate material already published. I confirm all authors consent to publication of this Work and authorise the granting of this licence.

1  
2 **Protocol for a scoping review on rehabilitation among individuals who experience homelessness**  
3  
4 **and traumatic brain injury**  
5  
6  
7

8  
9 Vincy Chan, PhD<sup>1-3</sup>, Maria Jennifer Estrella, MScOT<sup>4</sup>, Jessica Babineau, MLIS<sup>5</sup>, Angela Colantonio,  
10  
11 PhD<sup>1,2,3,4</sup>  
12  
13  
14

- 15  
16 1. KITE-Toronto Rehabilitation Institute, University Health Network, Toronto, Ontario, Canada
- 17  
18 2. Institute of Health Policy, Management and Evaluation, University of Toronto, Toronto,  
19  
20 Ontario, Canada
- 21  
22 3. Rehabilitation Sciences Institute, University of Toronto, Toronto, Ontario, Canada
- 23  
24 4. Department of Occupational Science & Occupational Therapy, University of Toronto, Toronto,  
25  
26 Ontario, Canada
- 27  
28 5. Library & Information Services, University Health Network, Toronto, Ontario, Canada  
29  
30  
31  
32  
33  
34  
35

36 Correspondence to:

37  
38 Dr. Vincy Chan

39  
40 KITE-Toronto Rehabilitation Institute, University Health Network

41  
42 550 University Avenue, Toronto, ON, M5G 2A2

43  
44 [vincy.chan@uhn.ca](mailto:vincy.chan@uhn.ca)

45  
46  
47 416-978-1250  
48  
49  
50  
51

52 **Word count:** 2169 (excluding Tables)  
53  
54  
55  
56  
57  
58  
59  
60

## ABSTRACT

**Introduction:** Rehabilitation is key to improving outcomes and quality of life after traumatic brain injury (TBI). However, individuals experiencing homelessness are rarely represented in research that informs evidence-based rehabilitation guidelines even though TBI is disproportionately prevalent among this population. This protocol is for a scoping review to explore the extent to which rehabilitation, including the types of rehabilitation interventions, is available to, or used by, individuals who experience homelessness and TBI to inform (a) opportunities to integrate rehabilitation for individuals who experience homelessness and TBI, (b) considerations for existing clinical and practice guidelines for rehabilitation, and (c) recommendations for future research.

**Methods and analysis:** The scoping review will be guided by six stages described in scoping review methodology frameworks. Electronic databases, reference list of included articles and scoping or systematic reviews identified from the search, and grey literature, defined as reports from relevant brain injury, housing, and rehabilitation organizations, will be searched. Two reviewers will independently screen all articles based on pre-determined inclusion and exclusion criteria. A descriptive numerical summary of data items will be provided and qualitative content analytic techniques will be used to identify and report common themes. Preliminary findings will be shared with stakeholders to seek feedback on the implications of the results.

**Ethics and dissemination:** Ethics review will not be required, as only publicly available data will be analyzed. Findings from the scoping review will be published in a peer-reviewed journal and presented at scientific meetings and to stakeholders, defined as service providers in the housing and brain injury sectors and health professionals who provide care for individuals with TBI and/or homelessness; health

1  
2 administrators, decision-makers, and policy-makers; researchers; and caregivers or family members of  
3  
4 individuals with lived experience of TBI and homelessness.  
5  
6  
7

8  
9 **Registration details:** This protocol will be registered in the Open Science Framework (OSF)  
10  
11 Registries.  
12  
13

14  
15 **Keywords:** Traumatic brain injury, Rehabilitation, Homelessness, Underserved population, Vulnerable  
16  
17 population  
18  
19  
20  
21  
22  
23  
24  
25  
26  
27  
28  
29  
30  
31  
32  
33  
34  
35  
36  
37  
38  
39  
40  
41  
42  
43  
44  
45  
46  
47  
48  
49  
50  
51  
52  
53  
54  
55  
56  
57  
58  
59  
60

## STRENGTHS AND LIMITATIONS OF THIS STUDY

- To the best of our knowledge, this is the first scoping review of rehabilitation among individuals experiencing homelessness and TBI; findings will inform (a) opportunities to integrate rehabilitation for individuals who experience homelessness and TBI, (b) considerations for existing clinical and practice guidelines for rehabilitation, and (c) recommendations for future research
- This protocol is guided by scoping review methodology frameworks to improve methodological rigour, an identified limitation of existing rehabilitation scoping reviews, and describes a transparent approach to comprehensively identify literature on rehabilitation and TBI among underserved populations, which increases replicability
- Intersecting sex, gender, social identities, and vulnerabilities will be considered in the charting of the data, analysis, and reporting of findings
- We acknowledge the risk of publication bias because only peer-reviewed articles or published reports will be included
- To evaluate and report on the risk of publication bias, non-English articles will not be immediately excluded; the decision to include or exclude non-English language full-texts will be determined at the time of the review, taking into account the availability of resources and the proportion of non-English full-text articles

## INTRODUCTION

Homelessness is a global crisis affecting an estimated 100 million people worldwide and becoming increasingly prevalent in many countries.[1] In Canada, more than 200,000 individuals experience homelessness every year.[2] This number is based on a 2016 national report; however, recent studies suggest that the state of homelessness in the country is worsening.[3, 4] Individuals who experience homelessness suffer from a broad range of health concerns, including systemic disorders (e.g., chronic obstructive pulmonary disease, seizures, arthritis, musculoskeletal disorders, tuberculosis) and mental health conditions and substance use, all contributing to extremely high mortality rates.[5-7] Consistently underrecognized is traumatic brain injury (TBI). Defined as “an alteration in brain function or other evidence of brain pathology caused by an external force,”[8] TBI is a serious public health problem and the leading cause of death and disability among all trauma-related injuries globally.[9]

Approximately 1 in 2 individuals who are homeless or precariously housed experience a lifetime TBI while almost 1 in 4 individuals experience a moderate to severe TBI.[10] These individuals experience adverse consequences of TBI, including cognitive and behavioural challenges related to memory, attention, mental fatigue, and irritability; fatigue and balance problems; and an increased likelihood of developing neurologic and psychiatric conditions, all of which impact various areas of life and can be long-lasting or permanent.[11-15] Among those experiencing homelessness specifically, TBI has been found to be associated with poorer physical and mental health status, increased likelihood of seizures, mental health and substance use problems, higher risk for suicide, increased health service use, and increased criminal justice system involvement.[10, 16, 17] If unaddressed, the effects of TBI and homelessness combined could lead to a cycle of repeated TBIs, prolonged homelessness, and substantial economic and health-related costs.[17-19]



1  
2  
3  
4 The long-term negative outcomes of TBI, along with the intersecting challenges experienced by  
5  
6 individuals who experience homelessness, demand long-term specialized supports including  
7  
8 rehabilitation. Rehabilitation, defined as "a set of interventions designed to optimize functioning and  
9  
10 reduce disability in individuals with health conditions in interaction with their environment," has been  
11  
12 identified by the World Health Organization (WHO) as an integral part of the health care continuum;  
13  
14 identified by the World Health Organization (WHO) as an integral part of the health care continuum;  
15  
16 when integrated with primary healthcare, rehabilitation can reduce disability, optimize the outcomes of  
17  
18 other interventions, and support full recovery.[20] Over the years, various rehabilitation interventions  
19  
20 have been found beneficial in managing TBI symptoms and facilitating outcomes such as community  
21  
22 integration and quality of life.[21, 22] The growing evidence base on TBI rehabilitation has informed  
23  
24 the development of evidence-based guidelines that provide comprehensive recommendations for TBI  
25  
26 care;[23] however, the research informing these guidelines do not sufficiently, if at all, represent  
27  
28 underserved populations, such as individuals experiencing homelessness. Further, while reviews on  
29  
30 TBI rehabilitation or clinical guidelines for homelessness exist,[21, 22, 24] there is none to date that  
31  
32 focuses on rehabilitation interventions across disciplines for individuals who experience homelessness  
33  
34 and TBI. This paucity of information suggests that existing evidence-based practice guidelines do not  
35  
36 reflect rehabilitation that are specific to the needs of individuals who experience homelessness and  
37  
38 TBI.  
39  
40  
41  
42  
43  
44

45  
46 This protocol is for a scoping review that aims to address this gap, by exploring the extent to which  
47  
48 rehabilitation, including types of rehabilitation interventions, is available to or used by individuals  
49  
50 experiencing homelessness and TBI. This review will also aim to summarize findings across sex,  
51  
52 gender, and other identity factors (e.g., age, race, ethnicity, and disability). To date, there is a lack of  
53  
54 information across intersecting identities even though they contribute to unique experiences that cannot  
55  
56 be addressed by looking at a single facet of identity.[25-28] The results of the scoping review will  
57  
58  
59  
60

1  
2 inform (a) opportunities to integrate rehabilitation for individuals who experience homelessness and  
3  
4 TBI, (b) considerations for existing clinical and practice guidelines, and (c) recommendations for future  
5  
6 research.  
7  
8  
9

## 10 11 **METHOD AND ANALYSIS** 12 13 14

15  
16 The scoping review will be guided by six stages described in Arksey and O'Malley's scoping review  
17  
18 methodology framework and Levac and colleagues' additional recommendations to this framework[29,  
19  
20 30] – (1) identifying the research question, (2) identifying relevant studies, (3) selecting studies, (4)  
21  
22 charting the data, (5) collating, summarizing, and reporting the results, and (6) consultation, which is an  
23  
24 optional stage. The reporting of the scoping review will follow the Preferred Reporting Items for  
25  
26 Systematic reviews and Meta-Analyses extension or Scoping Reviews (PRISMA-ScR).[31]  
27  
28  
29  
30  
31

### 32 *Stage 1: Identifying the research question* 33

34 The research question is: “To what extent is rehabilitation, including the types of rehabilitation  
35  
36 intervention, available to, or used by, individuals who experience homelessness and TBI?” As  
37  
38 rehabilitation encompasses a variety of disciplines and homelessness a variety of living situations, the  
39  
40 following parameters and definitions will guide the scoping review, including the search strategy, study  
41  
42 selection, charting of data, and reporting of findings.  
43  
44  
45  
46  
47

48 Rehabilitation will be defined using (a) the WHO's definition[32] and (b) rehabilitation teams  
49  
50 identified in evidence-based guidelines for TBI rehabilitation.[23, 33] Homelessness will be defined  
51  
52 using the Canadian Observatory of Homelessness (COH, formerly the Canadian Homelessness  
53  
54 Research Network) typology of homelessness: (a) unsheltered, (b) emergency sheltered, and (c)  
55  
56  
57  
58  
59  
60

provisionally accommodated.[34] Table 1 illustrates the parameters and associated definitions for rehabilitation and homelessness that will guide the review.

**Table 1.** Parameters and associated definitions for rehabilitation and homelessness.

| Concept          | Parameter                                                                                                                          | Definition                                                                                                                                                                                                                                                                                                                                                                                                                                             |
|------------------|------------------------------------------------------------------------------------------------------------------------------------|--------------------------------------------------------------------------------------------------------------------------------------------------------------------------------------------------------------------------------------------------------------------------------------------------------------------------------------------------------------------------------------------------------------------------------------------------------|
| Rehabilitation   | World Health Organization's definition of rehabilitation[32]                                                                       | "A set of interventions designed to optimize functioning and reduce disability in individuals with health conditions in interaction with their environment"                                                                                                                                                                                                                                                                                            |
|                  | Healthcare providers/professional disciplines identified in evidence-based clinical practice guidelines for rehabilitation[23, 33] | <ul style="list-style-type: none"> <li>• Speech-language pathologists</li> <li>• Occupational therapist</li> <li>• Physiotherapist</li> <li>• Social worker</li> <li>• Neuropsychologist and psychometrist</li> <li>• Psychologist with expertise in behavioural therapy</li> <li>• Nurse</li> <li>• Physician and/or psychiatrist</li> <li>• Rehabilitation support personnel</li> <li>• Nutritionist</li> <li>• Therapeutic recreationist</li> </ul> |
| Homelessness[34] | Unsheltered                                                                                                                        | Individuals who lack housing and are not accessing shelters:                                                                                                                                                                                                                                                                                                                                                                                           |

|  |                            |                                                                                                                                                                                                                                                                                                                                                                                                                                                 |
|--|----------------------------|-------------------------------------------------------------------------------------------------------------------------------------------------------------------------------------------------------------------------------------------------------------------------------------------------------------------------------------------------------------------------------------------------------------------------------------------------|
|  |                            | <ul style="list-style-type: none"> <li>• “Public or private spaces without consent or contract” or</li> <li>• “Places not intended for permanent human habitation”</li> </ul>                                                                                                                                                                                                                                                                   |
|  | Emergency sheltered        | <p>Individuals who cannot secure permanent housing and are accessing shelters or other system supports:</p> <ul style="list-style-type: none"> <li>• “Emergency overnight shelters for people who are homelessness” or</li> <li>• “Shelters for individuals/families impacted by family violence” or</li> <li>• “Emergency shelter for people fleeing a natural disaster or destruction of accommodation due to fires, floods, etc.”</li> </ul> |
|  | Provisionally accommodated | <p>Individuals without permanent shelter and are accessing accommodations that offer no prospect of permanent:</p> <ul style="list-style-type: none"> <li>• Interim housing</li> <li>• Living temporality with others</li> <li>• Accessing short-term, temporary rental without security of tenure</li> <li>• Living in institutional care and lack housing arrangements</li> </ul>                                                             |

- |  |  |                                                                                                                                |
|--|--|--------------------------------------------------------------------------------------------------------------------------------|
|  |  | <ul style="list-style-type: none"><li>• Accommodation/reception centres for recently arrived immigrants and refugees</li></ul> |
|--|--|--------------------------------------------------------------------------------------------------------------------------------|

1  
2  
3  
4  
5  
6  
7  
8  
9  
10  
11 *Stage 2: Identifying relevant studies*

12  
13 The comprehensive database search strategy proposed in this protocol was developed with an  
14 Information Specialist (JB) and involved iterative revisions with research team members who possess  
15 research and subject-matter expertise relevant to rehabilitation, TBI, and homelessness (see  
16 Supplementary File 1). The search strategy is developed for the MEDLINE® ALL (in Ovid, including  
17 Epub Ahead of Print, In-Process & Other Non-Indexed Citations, Ovid MEDLINE(R) Daily) database,  
18 and will be translated to: Embase and Embase Classic (Ovid), Cochrane CENTRAL Register of  
19 Clinical Trials (Ovid), CINAHL (EBSCO), APA PsycINFO (Ovid), Applied Social Sciences Index and  
20 Abstracts (Proquest), and Nursing and Allied Health (Proquest).  
21  
22  
23  
24  
25  
26  
27  
28  
29  
30  
31  
32  
33

34 The following concepts were developed to form the search strategy:

- 35  
36 A. Homelessness  
37  
38 B. Rehabilitation  
39  
40  
41 C. TBI or cognitive impairment  
42  
43  
44  
45

46 The final search strategy structure, (A + B) OR (A + C), will be used to search each database. No  
47 language or date limits will be placed on search strategies. In addition to comprehensive and structured  
48 database searching, reference list of included articles and scoping or systematic review articles  
49 identified from the search, and grey literature, defined as reports from relevant brain injury, housing,  
50 and rehabilitation organizations will be searched (see Supplementary File 1).  
51  
52  
53  
54  
55  
56  
57  
58  
59  
60

1  
2 *Stage 3: Study selection*  
3

4 To be included in the scoping review, peer-reviewed articles, grey literature, and reference list of  
5 included primary research articles and scoping or systematic reviews must meet the following inclusion  
6  
7  
8  
9 criteria:

- 10  
11 a) Describe and/or document rehabilitation and/or rehabilitation interventions that aim to optimize  
12  
13 functioning and reduce disability in interaction with their environment or the delivery of care or  
14  
15 describe and/or document rehabilitation services provided by healthcare providers/professional  
16  
17 disciplines, as defined in Table 1;  
18  
19  
20 b) Focus on individuals who are experiencing homelessness, as defined in Table 1;  
21  
22  
23 c) Include individuals with TBI; and  
24  
25  
26 d) Report primary research findings.  
27  
28

29  
30 Dissertations, conference proceedings, and articles that are narrative, commentaries, or describe a  
31  
32 theory or framework without reporting primary research findings will be excluded. Articles that look at  
33  
34 the broader brain-injured population (e.g., acquired brain injury) or individuals with cognitive  
35  
36 impairment without specific mention of TBI will also be excluded.  
37  
38

39  
40  
41 Relevant studies retrieved using the above search strategy will be imported into EndNote X8.2 for  
42  
43 reference management and Covidence for deduplication and study selection.[35] Two reviewers will  
44  
45 independently screen all articles based on the above inclusion and exclusion criteria. At the title and  
46  
47 abstract screen, articles that do not explicitly mention cognitive impairment or TBI will be considered  
48  
49 for the full-text screen to confirm the study include individuals with TBI. Prior to formal screening,  
50  
51 pilot testing of 20 titles and abstracts will be conducted, until a minimum 80% agreement using the  
52  
53 kappa statistic is achieved between the reviewers. At the full-text review, pilot testing of 10% of the  
54  
55 full-text articles will be conducted until a minimum of 80% agreement is achieved between the  
56  
57  
58  
59  
60

1  
2 reviewers. Non-English language abstracts will be assessed using the published English abstract and  
3  
4 the decision to include these articles in the full-text articles will be determined at the time of the  
5  
6 review, considering the availability of resources and proportion of non-English full-text articles. Any  
7  
8 discrepancies during the study selection stage will be resolved by consensus or consultation with a third  
9  
10 reviewer. The study selection process will be presented using the Preferred Reporting Items for  
11  
12 Systematic Reviews and Meta Analyses flow chart.[31]  
13  
14  
15  
16  
17  
18  
19

20 *Stage 4: Charting the data*  
21

22 Table 2 presents the charting table for the scoping review, which will be continually refined, as  
23  
24 recommended by Levac and colleagues' methodology framework.[30] One reviewer will  
25  
26 independently complete the charting table for each study and the completed table will then be  
27  
28 independently peer-reviewed by a second reviewer. Similar to the study selection stage, charting of the  
29  
30 data will begin with a random sample of five articles until a minimum of 80% agreement is achieved  
31  
32 between the reviewers. Discrepancies in charting the data will be resolved by consensus or in  
33  
34 consultation with a third reviewer.  
35  
36  
37  
38  
39  
40

41 Table 2. Charting table.  
42

| Data Item             |                     | Description                                                            |
|-----------------------|---------------------|------------------------------------------------------------------------|
| Study characteristics | Author              |                                                                        |
|                       | Year of publication |                                                                        |
|                       | Country of study    |                                                                        |
|                       | Type of article     | Note if the article was a peer-reviewed publication or grey literature |

|              |              |                                                                                                                                                                                                                             |
|--------------|--------------|-----------------------------------------------------------------------------------------------------------------------------------------------------------------------------------------------------------------------------|
|              | Study design | Specify if the study was quantitative, qualitative, or mixed methods and describe the study design                                                                                                                          |
|              | Objective    | Describe the stated objective of the study                                                                                                                                                                                  |
| Study sample | TBI          | Specify the definition of TBI or how TBI was identified/determined<br><br>Specify the injury severity, time since injury, method of diagnosis/screening, and the sample (N, %) of individuals with TBI                      |
|              | Homelessness | Specify the definition of homelessness<br><br>Specify the sample (N, %) of individuals experiencing homelessness                                                                                                            |
|              | Age          | Specify participants' age at the time of the study, at the time of TBI, and at the time of homelessness                                                                                                                     |
|              | Sex/Gender   | Specify if Sex- and Gender-Based Analysis Plus (SGBA+) was considered in the study design[36]<br><br>Note if and/or how sex and gender were defined in the study.<br><br>Specify the participants' sex and/or gender (N, %) |



|                |                  |                                                                                                                                                                                                                                                                                                                                                                                                                                                                                  |
|----------------|------------------|----------------------------------------------------------------------------------------------------------------------------------------------------------------------------------------------------------------------------------------------------------------------------------------------------------------------------------------------------------------------------------------------------------------------------------------------------------------------------------|
|                | Sociodemographic | <p>Specify sociodemographic characteristics of the sample (e.g., race, ethnicity, religion, disability, geography, culture, income, education)</p> <p>Note if/describe how the sample of individuals with homelessness and TBI intersect with the criminal justice/legal system or experienced violence, including intimate partner violence</p> <p>Note if/describe how the article acknowledged and/or accounted for intersecting social identities and/or vulnerabilities</p> |
| Rehabilitation | Intervention     | <p>Describe the focus or goal of the intervention</p> <p>Describe the type of rehabilitation intervention, how the intervention was delivered, the length or frequency of the intervention, and the setting of intervention</p> <p>Note the theories or principles of care that are guiding the intervention studied in the article</p>                                                                                                                                          |

|  |                     |                                                                                                                            |
|--|---------------------|----------------------------------------------------------------------------------------------------------------------------|
|  |                     | Note if/describe how the intervention acknowledged and/or accounted for intersecting social identities and vulnerabilities |
|  | Rehabilitation team | List the healthcare providers/professional disciplines that were involved in the intervention or rehabilitation process    |
|  | Outcome             | Describe the outcome of the intervention<br>Note any outcome(s) relevant to intersectionality                              |
|  | Barriers            | Describe any stated barriers to rehabilitation for individuals experiencing homelessness and TBI                           |
|  | Facilitators        | Describe any stated facilitators to rehabilitation for individuals experiencing homelessness and TBI                       |
|  | Gaps                | Describe any stated gaps in research on rehabilitation for individuals experiencing homelessness and TBI                   |

### *Stage 5: Collating, summarizing, and reporting the results*

As recommended by Levac and colleagues' methodology framework,[30] stage 5 will follow three distinct steps that may be refined further towards the end of the review, based on the content of the included articles:

1. Analyzing the data – a descriptive numerical summary of study characteristics, study sample, rehabilitation, and barriers, facilitators, and gaps will be provided and qualitative content analytic techniques will be applied to inform steps 2 (reporting results) and 3 (applying meaning

1  
2 to the results);[37] this method of data analysis is appropriate for this review, as it allows for the  
3  
4 quantification of data (i.e., taking into account the frequency of similar codes) in themes or  
5  
6 category development.[38]  
7

- 8  
9 2. Reporting results – findings will be reported in relation to the research question (the extent to  
10  
11 which rehabilitation, including the types of rehabilitation interventions, is available to, or used  
12  
13 by, individuals who experience homelessness and TBI).  
14  
15 3. Applying meaning to the results – implications for (a) opportunities to integrate rehabilitation  
16  
17 for individuals who experience homelessness and TBI, (b) considerations for existing clinical  
18  
19 and practice guidelines for rehabilitation, and (c) recommendations for future research will be  
20  
21 considered.  
22  
23  
24  
25  
26

### 27 *Stage 6: Consultation*

28  
29 Preliminary findings from stage 5 will be shared with stakeholders of this scoping review to identify  
30  
31 additional literature and seek feedback on the implications of the review on (a) opportunities to  
32  
33 integrate rehabilitation for individuals who experience homelessness and TBI, (b) considerations for  
34  
35 existing clinical and practice guidelines for rehabilitation, and (c) recommendations for future research.  
36  
37 Stakeholders include front-line staff and service providers in the housing and brain injury sectors;  
38  
39 health administrators, decision-makers, and policy-makers; health professionals who provide care for  
40  
41 individuals with TBI and/or individuals who experience homelessness; researchers and trainees who  
42  
43 conduct research on rehabilitation, TBI, and homelessness; and caregivers or family members of  
44  
45 individuals with lived experience of TBI and/or homelessness.  
46  
47  
48  
49  
50  
51  
52  
53  
54

### 55 **Patient and public involvement**

1  
2 Patients and the public were not involved in the creation of this scoping review protocol. However,  
3  
4 stage 6 of our proposed methods will engage stakeholders of this scoping review.  
5  
6  
7  
8  
9

## 10 **Ethics and Dissemination**

11  
12  
13 Ethics review will not be required because only published and publicly available data will be analyzed.  
14

15  
16 The scoping review will be published in a peer-reviewed journal. Findings will be presented at  
17  
18 scientific conferences and stakeholders defined in stage six of the scoping review.  
19  
20  
21

## 22 *Strengths and Limitations*

23  
24 We acknowledge the risk of publication bias, as only peer-reviewed articles or published reports will be  
25  
26 included. For example, pilot studies conducted as theses will not be captured in the scoping review  
27  
28 unless they are published in peer-reviewed journals. However, this protocol aims to minimize  
29  
30 publication bias by including non-English articles in the title and abstract screen using the published  
31  
32 English version of the abstract. The decision to include or exclude non-English language full-texts will  
33  
34 be determined at the time of the review, taking into account the availability of resources and proportion  
35  
36 of non-English full-text articles. Furthermore, it is recognized that community organizations serving  
37  
38 individuals experiencing homelessness and/or TBI may produce non-peer-reviewed reports of the  
39  
40 services they offer. As such, grey literature, defined as reports published by brain injury, housing, and  
41  
42 rehabilitation organizations, will also be searched.  
43  
44  
45  
46  
47  
48  
49

50  
51 To the best of our knowledge, this is the first protocol for a scoping review on rehabilitation among  
52  
53 individuals who experience homelessness and TBI. This protocol is guided by scoping review  
54  
55 methodology frameworks to improve methodological rigour, which also addresses an identified  
56  
57 limitation of existing rehabilitation scoping review.[39] This protocol also describes a transparent  
58  
59

1 approach to comprehensively identify literature on rehabilitation and TBI among underserved  
2 populations, which increases credibility and replicability. Importantly, intersecting sex, gender, social  
3 identities, and vulnerabilities, which are often overlooked in the literature, will be considered in the  
4 charting of the data, analysis, and reporting of findings. Findings from the scoping review will provide  
5 an evidence-based foundation to inform (a) opportunities to integrate rehabilitation for TBI for  
6 individuals experiencing homelessness, (b) considerations for existing clinical and practice guidelines,  
7 and (c) recommendations future research.  
8  
9  
10  
11  
12  
13  
14  
15  
16  
17  
18  
19  
20  
21  
22  
23  
24  
25  
26  
27  
28  
29  
30  
31  
32  
33  
34  
35  
36  
37  
38  
39  
40  
41  
42  
43  
44  
45  
46  
47  
48  
49  
50  
51  
52  
53  
54  
55  
56  
57  
58  
59  
60

**REFERENCES**

1. Affordable Housing, Inclusive Economic Policies Key to Ending Homelessness, Speakers Say as Social Development Commission Begins Annual Session [press release]. February 10, 2020 2020.
2. Gaetz S, Dej E, Richter T, Redman M. The State of Homelessness in Canada 2016. Toronto; 2016.
3. Strobel S, Burcul I, Dai JH, Ma Z, Jamani S, Hossain R. Characterizing people experiencing homelessness and trends in homelessness using population-level emergency department visit data in Ontario, Canada. *Health reports*. 2021;32(1):13-23.
4. Homelessness CAte, Research N. One in five Canadians have a friend or acquaintance who has been homeless; majority support building new affordable housing. 2020.
5. Hwang SW. Homelessness and health. *CMAJ : Canadian Medical Association journal = journal de l'Association medicale canadienne*. 2001;164(2):229-33.
6. Frankish CJ, Hwang SW, Quantz D. Homelessness and health in Canada: research lessons and priorities. *Canadian journal of public health = Revue canadienne de sante publique*. 2005;96 Suppl 2(Suppl 2):S23-9.
7. Aldridge RW, Story A, Hwang SW, Nordentoft M, Luchenski SA, Hartwell G, et al. Morbidity and mortality in homeless individuals, prisoners, sex workers, and individuals with substance use disorders in high-income countries: a systematic review and meta-analysis. *The Lancet*. 2018;391(10117):241-50.
8. Menon DK, Schwab K, Wright DW, Maas AI. Position statement: definition of traumatic brain injury. *Archives of physical medicine and rehabilitation*. 2010;91(11):1637-40.
9. Rubiano AM, Carney N, Chesnut R, Puyana JC. Global neurotrauma research challenges and opportunities. *Nature*. 2015;527(7578):S193-S7.

- 1  
2 10. Stubbs JL, Thornton AE, Sevick JM, Silverberg ND, Barr AM, Honer WG, et al. Traumatic  
3  
4 brain injury in homeless and marginally housed individuals: a systematic review and meta-analysis.  
5  
6 The Lancet Public Health. 2020;5(1):e19-e32.  
7
- 8  
9 11. Ponsford JL, Downing MG, Olver J, Ponsford M, Acher R, Carty M, et al. Longitudinal follow-  
10  
11 up of patients with traumatic brain injury: outcome at two, five, and ten years post-injury. Journal of  
12  
13 neurotrauma. 2014;31(1):64-77.  
14
- 15  
16 12. Ruet A, Bayen E, Jourdan C, Ghout I, Meaude L, Lalanne A, et al. A Detailed Overview of  
17  
18 Long-Term Outcomes in Severe Traumatic Brain Injury Eight Years Post-injury. Frontiers in  
19  
20 neurology. 2019;10:120.  
21
- 22  
23 13. Ahman S, Saveman BI, Styrke J, Björnstig U, Stålnacke BM. Long-term follow-up of patients  
24  
25 with mild traumatic brain injury: a mixed-method study. Journal of rehabilitation medicine.  
26  
27 2013;45(8):758-64.  
28
- 29  
30 14. Perry DC, Sturm VE, Peterson MJ, Pieper CF, Bullock T, Boeve BF, et al. Association of  
31  
32 traumatic brain injury with subsequent neurological and psychiatric disease: a meta-analysis. Journal of  
33  
34 neurosurgery. 2016;124(2):511-26.  
35
- 36  
37 15. Scholten AC, Haagsma JA, Cnossen MC, Olf M, van Beeck EF, Polinder S. Prevalence of and  
38  
39 Risk Factors for Anxiety and Depressive Disorders after Traumatic Brain Injury: A Systematic Review.  
40  
41 Journal of neurotrauma. 2016;33(22):1969-94.  
42
- 43  
44 16. Hwang SW, Colantonio A, Chiu S, Tolomiczenko G, Kiss A, Cowan L, et al. The effect of  
45  
46 traumatic brain injury on the health of homeless people. CMAJ : Canadian Medical Association journal  
47  
48 = journal de l'Association medicale canadienne. 2008;179(8):779-84.  
49
- 50  
51 17. To MJ, O'Brien K, Palepu A, Hubley AM, Farrell S, Aubry T, et al. Healthcare Utilization,  
52  
53 Legal Incidents, and Victimization Following Traumatic Brain Injury in Homeless and Vulnerably  
54  
55 Housed Individuals: A Prospective Cohort Study. The Journal of head trauma rehabilitation.  
56  
57 2015;30(4):270-6.  
58  
59

- 1  
2 18. Svoboda T, Ramsay JT. High rates of head injury among homeless and low-income housed  
3  
4 men: a retrospective cohort study. *Emergency medicine journal : EMJ*. 2014;31(7):571-5.  
5  
6 19. Adshead CD, Norman A, Holloway M. The inter-relationship between acquired brain injury,  
7  
8 substance use and homelessness; the impact of adverse childhood experiences: an interpretative  
9  
10 phenomenological analysis study. *Disability and rehabilitation*. 2019:1-13.  
11  
12 20. World Health O. Access to rehabilitation in primary health care: an ongoing challenge. Geneva:  
13  
14 World Health Organization; 2018 2018. Contract No.: WHO/HIS/SDS/2018.40.  
15  
16 21. Gordon WA, Zafonte R, Cicerone K, Cantor J, Brown M, Lombard L, et al. Traumatic brain  
17  
18 injury rehabilitation: state of the science. *American journal of physical medicine & rehabilitation*.  
19  
20 2006;85(4):343-82.  
21  
22 22. Teasell R, Marshall S, Cullen N, Bayley M, Rees L, Weiser M, et al. Evidence-based review of  
23  
24 moderate to severe acquired brain injury (ERABI) version 13. 2019.  
25  
26 23. Lamontagne M-E, Truchon C, Kagan C, Bayley M, Swaine B, Marshall S, et al. INESSS-ONF  
27  
28 clinical practice guidelines for the rehabilitation of adults having sustained a moderate-to-severe  
29  
30 TBI2017.  
31  
32 24. Pottie K, Kendall CE, Aubry T, Magwood O, Andermann A, Salvalaggio G, et al. Clinical  
33  
34 guideline for homeless and vulnerably housed people, and people with lived homelessness experience.  
35  
36 *Canadian Medical Association Journal*. 2020;192(10):E240.  
37  
38 25. Markowitz FE, Syverson J. Race, Gender, and Homelessness Stigma: Effects of Perceived  
39  
40 Blameworthiness and Dangerousness. *Deviant Behavior*. 2019:1-12.  
41  
42 26. Weisz C, Quinn DM. Stigmatized Identities, Psychological Distress, and Physical Health:  
43  
44 Intersections of Homelessness and Race. *Stigma and health (Washington, DC)*. 2018;3(3):229-40.  
45  
46 27. Whitzman C. At the Intersection of Invisibilities: Canadian women, homelessness and health  
47  
48 outside the 'big city'. *Gender, Place & Culture*. 2006;13(4):383-99.  
49  
50  
51  
52  
53  
54  
55  
56  
57  
58  
59  
60



- 1  
2 28. Colantonio A. Sex, Gender, and Traumatic Brain Injury: A Commentary. Archives of  
3  
4 physical medicine and rehabilitation. 2016;97(2):S1-S4.  
5  
6 29. Arksey H, O'Malley L. Scoping studies: towards a methodological framework. International  
7  
8 Journal of Social Research Methodology. 2005;8(1):19-32.  
9  
10 30. Levac D, Colquhoun H, O'Brien KK. Scoping studies: advancing the methodology.  
11  
12 Implementation Science. 2010;5(1):69.  
13  
14 31. Tricco AC, Lillie E, Zarin W, O'Brien KK, Colquhoun H, Levac D, et al. PRISMA Extension  
15  
16 for Scoping Reviews (PRISMA-ScR): Checklist and Explanation. Annals of internal medicine.  
17  
18 2018;169(7):467-73.  
19  
20 32. Rehabilitation: World Health Organization; 2021 [Available from: [https://www.who.int/news-](https://www.who.int/news-room/fact-sheets/detail/rehabilitation)  
21  
22 [room/fact-sheets/detail/rehabilitation](https://www.who.int/news-room/fact-sheets/detail/rehabilitation).  
23  
24  
25  
26 33. Reed N, Zemek R, Dawson J, Ledoux A-A, Provvidenza C, Paniccia M, et al. Living guideline  
27  
28 for diagnosing and managing pediatric concussion, 2021 March 1, 2021.  
29  
30 34. Gaetz S, Barr C, Friesen A, Harris B, Hill C, Kovacs-Burns K, et al. Canadian Definition of  
31  
32 Homelessness. Toronto; 2012.  
33  
34 35. Innovation VH. Covidence systematic review software. Melbourne, Australia.  
35  
36 36. Canada WaGE. What is Gender-based Analysis Plus 2021 [updated April 14, 2021. Available  
37  
38 from: [https://women-gender-equality.canada.ca/en/gender-based-analysis-plus/what-gender-based-](https://women-gender-equality.canada.ca/en/gender-based-analysis-plus/what-gender-based-analysis-plus.html)  
39  
40 [analysis-plus.html](https://women-gender-equality.canada.ca/en/gender-based-analysis-plus/what-gender-based-analysis-plus.html).  
41  
42  
43  
44 37. Hsieh H-F, Shannon SE. Three Approaches to Qualitative Content Analysis. Qualitative Health  
45  
46 Research. 2005;15(9):1277-88.  
47  
48 38. Vaismoradi M, Snelgrove S. **Theme in Qualitative Content Analysis and Thematic**  
49  
50 **Analysis**. Forum Qualitative Sozialforschung / Forum: Qualitative Social Research. 2019;20(3):1-14.  
51  
52  
53  
54  
55  
56  
57  
58  
59  
60

- 1  
2 39. Colquhoun HL, Jesus TS, O'Brien KK, Tricco AC, Chui A, Zarin W, et al. Scoping Review on  
3  
4 Rehabilitation Scoping Reviews. Archives of physical medicine and rehabilitation. 2020;101(8):1462-  
5  
6 9.  
7  
8  
9  
10  
11  
12  
13  
14  
15  
16  
17  
18  
19  
20  
21  
22  
23  
24  
25  
26  
27  
28  
29  
30  
31  
32  
33  
34  
35  
36  
37  
38  
39  
40  
41  
42  
43  
44  
45  
46  
47  
48  
49  
50  
51  
52  
53  
54  
55  
56  
57  
58  
59  
60

## **AUTHORS' CONTRIBUTIONS**

VC and AC conceptualized the study. VC, JE, and JB developed the search strategy. VC and JE formulated the design and drafted the manuscript. All authors critically reviewed the manuscript and approved the final manuscript.

## **ACKNOWLEDGMENTS**

The authors would like to thank Ms. Samira Omar, PhD Candidate at the Rehabilitation Sciences Institute, University of Toronto, for reviewing the final manuscript and providing editorial feedback.

## **FUNDING STATEMENT**

This work was supported by a Canada Research Chair (Tier 1) in Traumatic Brain Injury in Underserved Populations awarded to Dr. Angela Colantonio (Fund Number N/A).

## **COMPETING INTERESTS**

None declared.

## Supplementary File 1

### Search Description

This strategy was first developed in Medline, and was then translated to other databases. It uses the following concepts:

- Concept A (lines 1-15): Homelessness
- Concept B (lines 17-42) : Rehabilitation
- Concept C (lines 44-55): Traumatic brain injury or cognitive impairment

The search conducted is: (A + B) OR (A + C). This strategy was used in all searched databases. Searches were also limited to human studies when possible. No date or language limits were applied.

### Search Strategy

Database: Ovid MEDLINE(R) ALL <1946 to April 20, 2021>

1 exp Homeless persons/  
 2 homeless\*.tw,kf.  
 3 Roofless\*.tw,kf.  
 4 (Marginal\* adj3 hous\*).tw,kf.  
 5 (precarious\* adj3 hous\*).tw,kf.  
 6 (unstabl\* adj3 hous\*).tw,kf.  
 7 (instab\* adj3 hous\*).tw,kf.  
 8 (interim\* adj3 hous\*).tw,kf.  
 9 (temporary adj3 (liv\* or hous\*)).tw,kf.  
 10 ((liv\* or sleep\* or stay or emergenc\*) adj3 shelter??).tw,kf.  
 11 houseless\*.tw,kf.  
 12 unsheltered.tw,kf.  
 13 rough sleeper?.tw,kf.  
 14 rough sleeping.tw,kf.  
 15 provisionally accommodat\*.tw,kf.  
 16 or/1-15  
 17 "Physical and Rehabilitation Medicine"/  
 18 exp rehabilitation/  
 19 rehab\*.tw,kf,jw.  
 20 telerehab\*.tw,kf,jw.  
 21 neurorehab\*.tw,kf,jw.  
 22 rh.fs.  
 23 Rehabilitation Centers/  
 24 (physiatrist? or physiatry).tw,kf.  
 25 occupational therapy/  
 26 (occupational adj therap\*).tw,kf,jw.  
 27 physical therapy specialty/  
 28 (physical adj therap\*).tw,kf,jw.  
 29 physiotherap\*.tw,kf,jw.  
 30 physio-therapist\*.tw,kf,jw.  
 31 Speech-Language Pathology/  
 32 (speech adj2 (therap\* or patholog\*)).tw,kf,jw.  
 33 Neuropsychology/

1  
 2 34 Neuropsycholog\*.tw,kf,jw.  
 3 35 Nutritionists/  
 4 36 (Nutritionist? or Dietician?).tw,kf,jw.  
 5 37 (therap\* adj recreation\*).tw,kf,jw.  
 6 38 child life specialist?.tw,kf.  
 7 39 play therapy/  
 8 40 (play adj therap\*).tw,kf.  
 9 41 Respite Care/  
 10 42 respite.tw,kf.  
 11 43 or/17-42  
 12 44 exp Brain Injuries/  
 13 45 exp Brain Injuries, Traumatic/  
 14 46 exp Brain Concussion/  
 15 47 Craniocerebral Trauma/  
 16 48 tbi\*2.tw,kf.  
 17 49 mtbi\*2.tw,kf.  
 18 50 concuss\*.tw,kf.  
 19 51 postconcuss\*.tw,kf.  
 20 52 ((head\* or brain\* or cerebr\* or crani\* or skull\* or intracran\*) adj2 (injur\* or trauma\* or damag\*  
 21 or wound\* or swell\* or oedema\* or edema\* or fracture\* or contusion\* or pressur\*)).tw,kf,jw.  
 22 53 ((brain\* or cerebr\* or intracerebr\* or crani\* or intracran\* or head\* or subdural\* or epidural\* or  
 23 extradural\*) adj (haematoma\* or hematoma\* or hemorrhag\* or haemorrhag\* or bleed\*)).tw,kf.  
 24 54 exp cognition disorders/  
 25 55 ((cogniti\* or neurocogniti\*) adj2 (impair\* or dysfunction\* or disorder\* or declin\*)).tw,kf.  
 26 56 or/44-55  
 27 57 16 and 43  
 28 58 16 and 56  
 29 59 57 or 58  
 30 60 59 not (exp animals/ not humans.sh.)

### Grey Literature

Reports from the following brain injury, housing, and rehabilitation organizations will be searched:

- American Academy of Physical Medicine and Rehabilitation
- Canadian Alliance to End Homelessness
- Canadian Housing First Toolkit
- Centre for Urban Health Solutions
- Cochrane Methods Equity Homeless Health Guidelines
- Evidence Exchange Network for Mental Health Addictions
- Mental Health Commission of Canada
- Model Systems Knowledge Translation Center
- National Association of State Head Injury
- National Health Care for the Homeless Council
- Ruff Institute of Global Homelessness
- The Center for Brain Injury Research and Training
- The Homeless Hub

- 1
  - 2
  - 3
  - 4
  - 5
  - 6
  - 7
  - 8
  - 9
  - 10
  - 11
  - 12
  - 13
  - 14
  - 15
  - 16
  - 17
  - 18
  - 19
  - 20
  - 21
  - 22
  - 23
  - 24
  - 25
  - 26
  - 27
  - 28
  - 29
  - 30
  - 31
  - 32
  - 33
  - 34
  - 35
  - 36
  - 37
  - 38
  - 39
  - 40
  - 41
  - 42
  - 43
  - 44
  - 45
  - 46
  - 47
  - 48
  - 49
  - 50
  - 51
  - 52
  - 53
  - 54
  - 55
  - 56
  - 57
  - 58
  - 59
  - 60
- Toronto Alliance to End Homelessness
  - Toronto Mental Health and Addictions Supportive Housing Network
  - Wellesley Institute

For peer review only

# BMJ Open

## Protocol for a scoping review on rehabilitation among individuals who experience homelessness and traumatic brain injury

|                                 |                                                                                                                                                                                                                                                                                                                                                                                                                      |
|---------------------------------|----------------------------------------------------------------------------------------------------------------------------------------------------------------------------------------------------------------------------------------------------------------------------------------------------------------------------------------------------------------------------------------------------------------------|
| Journal:                        | <i>BMJ Open</i>                                                                                                                                                                                                                                                                                                                                                                                                      |
| Manuscript ID                   | bmjopen-2021-052942.R1                                                                                                                                                                                                                                                                                                                                                                                               |
| Article Type:                   | Protocol                                                                                                                                                                                                                                                                                                                                                                                                             |
| Date Submitted by the Author:   | 28-Sep-2021                                                                                                                                                                                                                                                                                                                                                                                                          |
| Complete List of Authors:       | Chan, Vincy; Toronto Rehabilitation Institute, KITE; University of Toronto, Rehabilitation Sciences Institute<br>Estrella, Maria Jennifer; University of Toronto, Department of Occupational Science & Occupational Therapy<br>Babineau, Jessica; Toronto Rehabilitation Institute, Research<br>Colantonio, Angela; University of Toronto, Rehabilitation Science Institute ; Toronto Rehabilitation Institute, KITE |
| <b>Primary Subject Heading</b>: | Rehabilitation medicine                                                                                                                                                                                                                                                                                                                                                                                              |
| Secondary Subject Heading:      | Public health, Rehabilitation medicine                                                                                                                                                                                                                                                                                                                                                                               |
| Keywords:                       | PUBLIC HEALTH, REHABILITATION MEDICINE, TRAUMA MANAGEMENT                                                                                                                                                                                                                                                                                                                                                            |
|                                 |                                                                                                                                                                                                                                                                                                                                                                                                                      |

SCHOLARONE™  
Manuscripts



I, the Submitting Author has the right to grant and does grant on behalf of all authors of the Work (as defined in the below author licence), an exclusive licence and/or a non-exclusive licence for contributions from authors who are: i) UK Crown employees; ii) where BMJ has agreed a CC-BY licence shall apply, and/or iii) in accordance with the terms applicable for US Federal Government officers or employees acting as part of their official duties; on a worldwide, perpetual, irrevocable, royalty-free basis to BMJ Publishing Group Ltd ("BMJ") its licensees and where the relevant Journal is co-owned by BMJ to the co-owners of the Journal, to publish the Work in this journal and any other BMJ products and to exploit all rights, as set out in our [licence](#).

The Submitting Author accepts and understands that any supply made under these terms is made by BMJ to the Submitting Author unless you are acting as an employee on behalf of your employer or a postgraduate student of an affiliated institution which is paying any applicable article publishing charge ("APC") for Open Access articles. Where the Submitting Author wishes to make the Work available on an Open Access basis (and intends to pay the relevant APC), the terms of reuse of such Open Access shall be governed by a Creative Commons licence – details of these licences and which [Creative Commons](#) licence will apply to this Work are set out in our licence referred to above.

Other than as permitted in any relevant BMJ Author's Self Archiving Policies, I confirm this Work has not been accepted for publication elsewhere, is not being considered for publication elsewhere and does not duplicate material already published. I confirm all authors consent to publication of this Work and authorise the granting of this licence.



1  
2 **Protocol for a scoping review on rehabilitation among individuals who experience homelessness**  
3  
4 **and traumatic brain injury**  
5  
6  
7

8  
9 Vincy Chan, PhD<sup>1-3</sup>, Maria Jennifer Estrella, MScOT<sup>4</sup>, Jessica Babineau, MLIS<sup>5</sup>, Angela Colantonio,  
10  
11 PhD<sup>1,2,3,4</sup>  
12  
13  
14

- 15 1. KITE-Toronto Rehabilitation Institute, University Health Network, Toronto, Ontario, Canada
- 16 2. Institute of Health Policy, Management and Evaluation, University of Toronto, Toronto,  
17  
18 Ontario, Canada
- 19 3. Rehabilitation Sciences Institute, University of Toronto, Toronto, Ontario, Canada
- 20 4. Department of Occupational Science & Occupational Therapy, University of Toronto, Toronto,  
21  
22 Ontario, Canada
- 23 5. Library & Information Services, University Health Network, Toronto, Ontario, Canada
- 24  
25  
26  
27  
28  
29  
30  
31  
32  
33  
34  
35

36 Correspondence to:

37  
38 Dr. Vincy Chan

39  
40 KITE-Toronto Rehabilitation Institute, University Health Network

41  
42 550 University Avenue, Toronto, ON, M5G 2A2

43  
44 [vincy.chan@uhn.ca](mailto:vincy.chan@uhn.ca)

45  
46  
47 416-978-1250  
48  
49  
50  
51

52 **Word count:** 2989 (excluding Tables)  
53  
54  
55  
56  
57  
58  
59  
60

## ABSTRACT

**Introduction:** Rehabilitation is key to improving outcomes and quality of life after traumatic brain injury (TBI). However, individuals experiencing homelessness are rarely represented in research that informs evidence-based rehabilitation guidelines even though TBI is disproportionately prevalent among this population. This protocol is for a scoping review to explore the extent to which rehabilitation, including the types of rehabilitation interventions, is available to, or used by, individuals who experience homelessness and TBI to inform (a) opportunities to integrate rehabilitation for individuals who experience homelessness and TBI, (b) considerations for existing clinical and practice guidelines for rehabilitation, and (c) recommendations for future research.

**Methods and analysis:** The scoping review will be guided by six stages described in scoping review methodology frameworks. Electronic databases (MEDLINE, Embase and Embase Classic, Cochrane CENTRAL Register of Clinical Trials, CINAHL, APA PsycINFO, Applied Social Sciences Index and Abstracts, and Nursing and Allied Health), reference list of included articles and scoping or systematic reviews identified from the search, and grey literature, defined as reports from relevant brain injury, housing, and rehabilitation organizations, will be searched. Two reviewers will independently screen all articles based on pre-determined inclusion and exclusion criteria. A descriptive numerical summary of data items will be provided and qualitative content analytic techniques will be used to identify and report common themes. Preliminary findings will be shared with stakeholders to seek feedback on the implications of the results.

**Ethics and dissemination:** Ethics review will not be required, as only publicly available data will be analyzed. Findings from the scoping review will be published in a peer-reviewed journal and presented at scientific meetings and to stakeholders, defined as service providers in the housing and TBI sectors;

1  
2 health professionals who provide care for individuals with TBI and/or homelessness; health  
3  
4 administrators, decision-makers, and policy-makers; researchers; and caregivers or family members of  
5  
6 individuals with lived experience of TBI and homelessness.  
7  
8  
9

10  
11 **Registration details:** This protocol will be registered in the Open Science Framework (OSF)  
12  
13 Registries.  
14

15  
16  
17  
18 **Keywords:** Traumatic brain injury, Rehabilitation, Homelessness, Underserved population, Vulnerable  
19  
20 population  
21  
22  
23  
24  
25  
26  
27  
28  
29  
30  
31  
32  
33  
34  
35  
36  
37  
38  
39  
40  
41  
42  
43  
44  
45  
46  
47  
48  
49  
50  
51  
52  
53  
54  
55  
56  
57  
58  
59  
60

## STRENGTHS AND LIMITATIONS OF THIS STUDY

- To the best of our knowledge, this is the first scoping review of rehabilitation among individuals experiencing homelessness and TBI; findings will inform (a) opportunities to integrate rehabilitation for individuals who experience homelessness and TBI, (b) considerations for existing clinical and practice guidelines for rehabilitation, and (c) recommendations for future research
- This protocol is guided by scoping review methodology frameworks to improve methodological rigour, an identified limitation of existing rehabilitation scoping reviews, and describes a transparent approach to comprehensively identify literature on rehabilitation and TBI among underserved populations, which increases replicability
- Intersecting sex, gender, social identities, and vulnerabilities will be considered in the charting of the data, analysis, and reporting of findings
- We acknowledge the risk of publication bias because only peer-reviewed articles or published reports will be included
- To evaluate and report on the risk of publication bias, non-English articles will not be immediately excluded; the decision to include or exclude non-English language full-texts will be determined at the time of the review, taking into account the availability of resources and the proportion of non-English full-text articles

## INTRODUCTION

Homelessness is a global crisis affecting an estimated 100 million people worldwide and becoming increasingly prevalent in many countries.[1] In Canada, more than 200,000 individuals experience homelessness every year.[2] This number is based on a 2016 national report; however, recent studies suggest that the state of homelessness in the country is worsening.[3, 4] Individuals who experience homelessness suffer from a broad range of health concerns, including systemic disorders (e.g., chronic obstructive pulmonary disease, seizures, arthritis, musculoskeletal disorders, tuberculosis) and mental health conditions and substance use, all contributing to extremely high mortality rates.[5-7] Consistently underrecognized is traumatic brain injury (TBI). Defined as “an alteration in brain function or other evidence of brain pathology caused by an external force,”[8] TBI is a serious public health problem and the leading cause of death and disability among all trauma-related injuries globally.[9]

Approximately 1 in 2 individuals who are homeless or precariously housed experience a lifetime TBI while almost 1 in 4 individuals experience a moderate to severe TBI.[10] Evidence suggests that the relationship between TBI and homelessness is bidirectional, with TBI preceding and prolonging homelessness.[10-12] The first incidence of TBI was often found to occur before the onset of homelessness,[12] and moderate to severe TBI was associated with the initial loss of stable housing and a longer duration of homelessness and precarious housing.[11] Individuals with TBI often experience cognitive and behavioural challenges related to memory, attention, mental fatigue, and irritability; fatigue and balance problems; and an increased likelihood of developing neurologic and psychiatric conditions, all of which impact various areas of life and can be long-lasting or permanent.[13-17] Among those experiencing homelessness specifically, TBI has been found to be associated with poorer physical and mental health status, increased likelihood of seizures, mental health and substance use

1  
2 problems, higher risk for suicide, increased health service use, and increased criminal justice system  
3  
4 involvement.[10, 18, 19] TBI-specific challenges, combined with other physical and mental health  
5  
6 problems, and factors such as financial constraints and lack of social supports, lead to difficulties  
7  
8 maintaining housing and increase the risk for homelessness. As the literature suggests, homelessness is  
9  
10 a fluid experience characterized by frequent shifts in physical living situations (i.e., unsheltered,  
11  
12 emergency, and provisionally accommodated) and changes in housing status (i.e., at risk of  
13  
14 homelessness to experiencing homelessness).[20] If unaddressed, the effects of TBI and homelessness  
15  
16 combined could lead to a cycle of repeated TBIs, prolonged homelessness, and substantial economic  
17  
18 and health-related costs.[19, 21, 22]  
19  
20  
21  
22  
23  
24

25 The long-term negative outcomes of TBI, along with the intersecting challenges experienced by  
26  
27 individuals who experience homelessness, demand long-term specialized supports including  
28  
29 rehabilitation. Rehabilitation, defined as "a set of interventions designed to optimize functioning and  
30  
31 reduce disability in individuals with health conditions in interaction with their environment," has been  
32  
33 identified by the World Health Organization (WHO) as an integral part of the health care continuum;  
34  
35 when integrated with primary healthcare, rehabilitation can reduce disability, optimize the outcomes of  
36  
37 other interventions, and support full recovery.[23] Over the years, various rehabilitation interventions  
38  
39 have been found beneficial in managing TBI symptoms and facilitating outcomes such as community  
40  
41 integration and quality of life.[24, 25] The growing evidence base on TBI rehabilitation has informed  
42  
43 the development of evidence-based guidelines that provide comprehensive recommendations for TBI  
44  
45 care;[26] however, the research informing these guidelines do not sufficiently, if at all, represent  
46  
47 underserved populations, such as individuals experiencing homelessness. Further, while reviews on  
48  
49 TBI rehabilitation or clinical guidelines for homelessness exist,[24, 25, 27] there is none to date that  
50  
51 focuses on rehabilitation interventions across disciplines for individuals who experience homelessness  
52  
53 and TBI. This paucity of information suggests that existing evidence-based practice guidelines do not  
54  
55  
56  
57  
58  
59  
60

1  
2 reflect rehabilitation that are specific to the needs of individuals who experience homelessness and  
3  
4 TBI.  
5  
6  
7

8  
9 This protocol is for a scoping review that aims to address this gap, by exploring the extent to which  
10 rehabilitation, including types of rehabilitation interventions, is available to or used by individuals  
11 experiencing homelessness and TBI. This review will also aim to summarize findings across sex,  
12 gender, and other identity factors (e.g., age, race, ethnicity, and disability). To date, there is a lack of  
13 information across intersecting identities even though they contribute to unique experiences that cannot  
14 be addressed by looking at a single facet of identity.[28-31] The results of the scoping review will  
15 inform (a) opportunities to integrate rehabilitation for individuals who experience homelessness and  
16 TBI, (b) considerations for existing clinical and practice guidelines, and (c) recommendations for future  
17 research.  
18  
19  
20  
21  
22  
23  
24  
25  
26  
27  
28  
29  
30

## 31 32 **METHOD AND ANALYSIS** 33 34 35

36 The scoping review will be guided by six stages described in Arksey and O'Malley's scoping review  
37 methodology framework and Levac and colleagues' additional recommendations to this framework[32,  
38 33] – (1) identifying the research question, (2) identifying relevant studies, (3) selecting studies, (4)  
39 charting the data, (5) collating, summarizing, and reporting the results, and (6) consultation, which is an  
40 optional stage. The reporting of the scoping review will follow the Preferred Reporting Items for  
41 Systematic reviews and Meta-Analyses extension or Scoping Reviews (PRISMA-ScR).[34]  
42  
43  
44  
45  
46  
47  
48  
49  
50  
51

### 52 *Stage 1: Identifying the research question* 53

54 The research question is: “To what extent is rehabilitation, including the types of rehabilitation  
55 intervention, available to, or used by, individuals who experience homelessness and TBI?” As  
56  
57  
58  
59  
60

rehabilitation encompasses a variety of disciplines and homelessness a variety of living situations, the following parameters and definitions will guide the scoping review, including the search strategy, study selection, charting of data, and reporting of findings.

Rehabilitation will be defined using (a) the WHO's definition[35] and (b) rehabilitation teams identified in evidence-based guidelines for TBI rehabilitation.[26, 36] Homelessness will be defined using the Canadian Observatory of Homelessness (COH, formerly the Canadian Homelessness Research Network) typology of homelessness that encompasses the following physical living situations: (a) unsheltered, (b) emergency sheltered, and (c) provisionally accommodated.[20] Table 1 illustrates the parameters and associated definitions for rehabilitation and homelessness that will guide the review.

**Table 1.** Parameters and associated definitions for rehabilitation and homelessness.

| Concept          | Parameter                                                                                                                          | Definition                                                                                                                                                                                                                                                                                                                                                                                                                                             |
|------------------|------------------------------------------------------------------------------------------------------------------------------------|--------------------------------------------------------------------------------------------------------------------------------------------------------------------------------------------------------------------------------------------------------------------------------------------------------------------------------------------------------------------------------------------------------------------------------------------------------|
| Rehabilitation   | World Health Organization's definition of rehabilitation[35]                                                                       | "A set of interventions designed to optimize functioning and reduce disability in individuals with health conditions in interaction with their environment"                                                                                                                                                                                                                                                                                            |
|                  | Healthcare providers/professional disciplines identified in evidence-based clinical practice guidelines for rehabilitation[26, 36] | <ul style="list-style-type: none"> <li>• Speech-language pathologists</li> <li>• Occupational therapist</li> <li>• Physiotherapist</li> <li>• Social worker</li> <li>• Neuropsychologist and psychometrist</li> <li>• Psychologist with expertise in behavioural therapy</li> <li>• Nurse</li> <li>• Physician and/or psychiatrist</li> <li>• Rehabilitation support personnel</li> <li>• Nutritionist</li> <li>• Therapeutic recreationist</li> </ul> |
| Homelessness[20] | Unsheltered                                                                                                                        | Individuals who lack housing and are not accessing shelters: <ul style="list-style-type: none"> <li>• "Public or private spaces without consent or contract" or</li> <li>• "Places not intended for permanent human habitation"</li> </ul>                                                                                                                                                                                                             |



|  |                            |                                                                                                                                                                                                                                                                                                                                                                                                                                                                             |
|--|----------------------------|-----------------------------------------------------------------------------------------------------------------------------------------------------------------------------------------------------------------------------------------------------------------------------------------------------------------------------------------------------------------------------------------------------------------------------------------------------------------------------|
|  | Emergency sheltered        | <p>Individuals who cannot secure permanent housing and are accessing shelters or other system supports:</p> <ul style="list-style-type: none"> <li>• “Emergency overnight shelters for people who are homelessness” or</li> <li>• “Shelters for individuals/families impacted by family violence” or</li> <li>• “Emergency shelter for people fleeing a natural disaster or destruction of accommodation due to fires, floods, etc.”</li> </ul>                             |
|  | Provisionally accommodated | <p>Individuals without permanent shelter and are accessing accommodations that offer no prospect of permanent:</p> <ul style="list-style-type: none"> <li>• Interim housing</li> <li>• Living temporality with others</li> <li>• Accessing short-term, temporary rental without security of tenure</li> <li>• Living in institutional care and lack housing arrangements</li> <li>• Accommodation/reception centres for recently arrived immigrants and refugees</li> </ul> |

### *Stage 2: Identifying relevant studies*

The comprehensive database search strategy proposed in this protocol was developed with an Information Specialist (JB) and involved iterative revisions with research team members who possess research and subject-matter expertise relevant to rehabilitation, TBI, and homelessness (see Supplementary File 1). The search strategy is developed for the MEDLINE® ALL (in Ovid, including Epub Ahead of Print, In-Process & Other Non-Indexed Citations, Ovid MEDLINE(R) Daily) database, and will be translated to: Embase and Embase Classic (Ovid), Cochrane CENTRAL Register of Clinical Trials (Ovid), CINAHL (EBSCO), APA PsycINFO (Ovid), Applied Social Sciences Index and Abstracts (Proquest), and Nursing and Allied Health (Proquest).

The following concepts were developed to form the search strategy:

A. Homelessness

B. Rehabilitation

### C. TBI or cognitive impairment

The final search strategy structure, (A + B) OR (A + C), will be used to search each database. No language or date limits will be placed on search strategies. In addition to comprehensive and structured database searching, reference list of included articles and scoping or systematic review articles identified from the search, and grey literature, defined as reports from relevant brain injury, housing, and rehabilitation organizations will be searched (see Supplementary File 1).

#### *Stage 3: Study selection*

To be included in the scoping review, peer-reviewed articles, grey literature, and reference list of included primary research articles and scoping or systematic reviews must meet the following inclusion criteria:

- a) Describe and/or document rehabilitation and/or rehabilitation interventions that aim to optimize functioning and reduce disability in interaction with their environment or the delivery of care or describe and/or document rehabilitation services provided by healthcare providers/professional disciplines, as defined in Table 1;
- b) Focus on individuals who are experiencing homelessness, as defined in Table 1;
- c) Include individuals with TBI; and
- d) Report primary research findings.

Dissertations, conference proceedings, and articles that are narrative, commentaries, or describe a theory or framework without reporting primary research findings will be excluded. Articles that look at the broader brain-injured population (e.g., acquired brain injury) or individuals with cognitive impairment without specific mention of TBI will also be excluded.

1  
2 Relevant studies retrieved using the above search strategy will be imported into EndNote X8.2 for  
3  
4 reference management and Covidence for deduplication and study selection.[37] Two reviewers will  
5  
6 independently screen all articles based on the above inclusion and exclusion criteria. At the title and  
7  
8 abstract screen, articles that do not explicitly mention cognitive impairment or TBI will be considered  
9  
10 for the full-text screen to confirm the study include individuals with TBI. Prior to formal screening,  
11  
12 pilot testing of 20 titles and abstracts will be conducted, until a minimum 80% agreement using the  
13  
14 kappa statistic is achieved between the reviewers. At the full-text review, pilot testing of 10% of the  
15  
16 full-text articles will be conducted until a minimum of 80% agreement is achieved between the  
17  
18 reviewers. Non-English language abstracts will be assessed using the published English abstract and  
19  
20 the decision to include these articles in the full-text articles will be determined at the time of the  
21  
22 review, considering the availability of resources and proportion of non-English full-text articles. Any  
23  
24 discrepancies during the study selection stage will be resolved by consensus or consultation with a third  
25  
26 reviewer. The study selection process will be presented using the Preferred Reporting Items for  
27  
28 Systematic Reviews and Meta Analyses flow chart.[34]  
29  
30  
31  
32  
33  
34  
35  
36  
37  
38

#### 39 *Stage 4: Charting the data*

40  
41 Table 2 presents the charting table for the scoping review, which will be continually refined, as  
42  
43 recommended by Levac and colleagues' methodology framework.[33] One reviewer will  
44  
45 independently complete the charting table for each study and the completed table will then be  
46  
47 independently peer-reviewed by a second reviewer. Similar to the study selection stage, charting of the  
48  
49 data will begin with a random sample of five articles until a minimum of 80% agreement is achieved  
50  
51 between the reviewers. Discrepancies in charting the data will be resolved by consensus or in  
52  
53 consultation with a third reviewer.  
54  
55  
56  
57  
58  
59  
60

Table 2. Charting table.

| Data Item             |                     | Description                                                                                                                                                                                                                                                                                                                                                                                                                                                                                                                                                               |
|-----------------------|---------------------|---------------------------------------------------------------------------------------------------------------------------------------------------------------------------------------------------------------------------------------------------------------------------------------------------------------------------------------------------------------------------------------------------------------------------------------------------------------------------------------------------------------------------------------------------------------------------|
| Study characteristics | Author              |                                                                                                                                                                                                                                                                                                                                                                                                                                                                                                                                                                           |
|                       | Year of publication |                                                                                                                                                                                                                                                                                                                                                                                                                                                                                                                                                                           |
|                       | Country of study    |                                                                                                                                                                                                                                                                                                                                                                                                                                                                                                                                                                           |
|                       | Type of article     | Note if the article was a peer-reviewed publication or grey literature                                                                                                                                                                                                                                                                                                                                                                                                                                                                                                    |
|                       | Study design        | Specify if the study was quantitative, qualitative, or mixed methods and describe the study design                                                                                                                                                                                                                                                                                                                                                                                                                                                                        |
|                       | Objective           | Describe the stated objective of the study                                                                                                                                                                                                                                                                                                                                                                                                                                                                                                                                |
| Study sample          | TBI                 | Specify the definition of TBI or how TBI was identified/determined<br><br>Specify the injury severity, time since injury, method of diagnosis/screening, timing of TBI relative to homelessness (e.g., whether TBI predated homelessness, if the individual was homeless at the time of TBI), and the sample (N, %) of individuals with TBI                                                                                                                                                                                                                               |
|                       | Homelessness        | Specify the definition of homelessness<br><br>Specify the sample (N, %) of individuals experiencing homelessness                                                                                                                                                                                                                                                                                                                                                                                                                                                          |
|                       | Age                 | Specify participants' age at the time of the study, at the time of TBI, and at the time of homelessness                                                                                                                                                                                                                                                                                                                                                                                                                                                                   |
|                       | Sex/Gender          | Specify if Sex- and Gender-Based Analysis Plus (SGBA+) was considered in the study design[38]<br><br>Note if and/or how sex and gender were defined in the study.<br><br>Specify the participants' sex and/or gender (N, %)                                                                                                                                                                                                                                                                                                                                               |
|                       | Sociodemographic    | Specify sociodemographic characteristics of the sample (e.g., race, ethnicity, religion, disability, geography, culture, income, education), including experiences consistent with those at risk of homelessness as defined in the COH [20]<br><br>Note if/describe how the sample of individuals with homelessness and TBI intersect with the criminal justice/legal system or experienced violence, including intimate partner violence<br><br>Note if/describe how the article acknowledged and/or accounted for intersecting social identities and/or vulnerabilities |
| Rehabilitation        | Intervention        | Describe the focus or goal of the intervention                                                                                                                                                                                                                                                                                                                                                                                                                                                                                                                            |

|  |                     |                                                                                                                                                                           |
|--|---------------------|---------------------------------------------------------------------------------------------------------------------------------------------------------------------------|
|  |                     | Describe the type of rehabilitation intervention, how the intervention was delivered, the length or frequency of the intervention, and the setting of intervention        |
|  |                     | Note the theories or principles of care that are guiding the intervention studied in the article                                                                          |
|  |                     | Note if/describe how the intervention acknowledged and/or accounted for intersecting social identities and vulnerabilities and housing status at the time of intervention |
|  | Rehabilitation team | List the healthcare providers/professional disciplines that were involved in the intervention or rehabilitation process                                                   |
|  |                     | Note if the rehabilitation team collaborates with or have access to housing providers and other providers/disciplines not specified in Table 1                            |
|  | Outcome             | Describe the outcome of the intervention<br>Note any outcome(s) relevant to intersectionality                                                                             |
|  | Barriers            | Describe any stated barriers to rehabilitation for individuals experiencing homelessness and TBI                                                                          |
|  | Facilitators        | Describe any stated facilitators to rehabilitation for individuals experiencing homelessness and TBI                                                                      |
|  | Gaps                | Describe any stated gaps in research on rehabilitation for individuals experiencing homelessness and TBI                                                                  |

### *Stage 5: Collating, summarizing, and reporting the results*

As recommended by Levac and colleagues' methodology framework,[33] stage 5 will follow three distinct steps that may be refined further towards the end of the review, based on the content of the included articles:

1. Analyzing the data – a descriptive numerical summary of study characteristics, study sample, rehabilitation, and barriers, facilitators, and gaps will be provided and qualitative content analytic techniques will be applied to inform steps 2 (reporting results) and 3 (applying meaning to the results);[39] this method of data analysis is appropriate for this review, as it allows for the quantification of data (i.e., taking into account the frequency of similar codes) in themes or category development.[40] Furthermore, we will assess the quality of the included studies using

- 1 the Study Quality Assessment Tools designed by methodologists from the Research Triangle  
2 Institute International and the National Heart, Lung, and Blood Institute of the National  
3  
4 Institutes of Health. These tools aim to assess the internal validity of a study, including sources  
5  
6 of bias, confounding, study power, and other factors [41], to critically appraise different study  
7  
8 designs. These quality assessments tools will be used to inform the process of applying meaning  
9  
10 to the results, specified in step 3. No articles will be eliminated based on the quality assessment.  
11  
12  
13  
14  
15  
16 2. Reporting results – findings will be reported in relation to the research question (the extent to  
17  
18 which rehabilitation, including the types of rehabilitation interventions, is available to, or used  
19  
20 by, individuals who experience homelessness and TBI).  
21  
22  
23 3. Applying meaning to the results – implications for (a) opportunities to integrate rehabilitation  
24  
25 for individuals who experience homelessness and TBI, (b) considerations for existing clinical  
26  
27 and practice guidelines for rehabilitation, and (c) recommendations for future research will be  
28  
29 considered.  
30  
31  
32  
33

#### 34 *Stage 6: Consultation*

35  
36 Preliminary findings from stage 5 will be shared with stakeholders of this scoping review to identify  
37  
38 additional literature and seek feedback on the implications of the review on (a) opportunities to  
39  
40 integrate rehabilitation for individuals who experience homelessness and TBI, (b) considerations for  
41  
42 existing clinical and practice guidelines for rehabilitation, and (c) recommendations for future research.  
43  
44 Stakeholders include front-line staff and service providers in the housing and brain injury sectors;  
45  
46 health administrators, decision-makers, and policy-makers; health professionals who provide care for  
47  
48 individuals with TBI and/or individuals who experience homelessness; researchers and trainees who  
49  
50 conduct research on rehabilitation, TBI, and homelessness; and caregivers or family members of  
51  
52 individuals with lived experience of TBI and/or homelessness.  
53  
54  
55  
56  
57  
58  
59  
60

## Patient and public involvement

Patients and the public were not involved in the creation of this scoping review protocol. However, stage 6 of our proposed methods will engage stakeholders of this scoping review.

## Ethics and Dissemination

Ethics review will not be required because only published and publicly available data will be analyzed.

The scoping review will be published in a peer-reviewed journal. Findings will be presented at scientific conferences and stakeholders defined in stage six of the scoping review.

## *Strengths and Limitations*

We acknowledge the risk of publication bias, as only peer-reviewed articles or published reports will be included. For example, pilot studies conducted as theses will not be captured in the scoping review unless they are published in peer-reviewed journals. However, this protocol aims to minimize publication bias by including non-English articles in the title and abstract screen using the published English version of the abstract. The decision to include or exclude non-English language full-texts will be determined at the time of the review, taking into account the availability of resources and proportion of non-English full-text articles. Furthermore, it is recognized that community organizations serving individuals experiencing homelessness and/or TBI may produce non-peer-reviewed reports of the services they offer. As such, grey literature, defined as reports published by brain injury, housing, and rehabilitation organizations, will also be searched. We also acknowledge that the inclusion of quality assessment deviates from the methodology frameworks used to inform this protocol [32, 33]. No studies will be excluded from this scoping review based on the quality assessment, however, results from the assessment will be considered when we apply meaning to the findings that are used to inform

1  
2 considerations for future research, the integration of rehabilitation, and clinical and best practices  
3  
4 guidelines. Finally, this scoping review will not explicitly search for articles that only focus on  
5  
6 individuals at risk of homelessness, defined as “people who are not homeless, but whose current  
7  
8 economic and/or housing situation is precarious or does not meet public health and safety  
9  
10 standard.”[20] For example, articles that focus on precariously employed individuals without explicit  
11  
12 mention of being unsheltered, emergency sheltered, and provisionally accommodated will not be  
13  
14 included in this review. We acknowledge that homelessness is a fluid experience, with similar factors  
15  
16 associated with unmet healthcare needs among those who are homeless and vulnerably housed. [42]  
17  
18 However, the goal of this scoping review is to explore the extent to which rehabilitation, including the  
19  
20 types of rehabilitation intervention, is available to, or used by individuals experiencing homelessness  
21  
22 and TBI. Rehabilitation studies focused on individuals with TBI who are unsheltered, emergency  
23  
24 sheltered, and provisionally accommodated may describe a different rehabilitation experience than  
25  
26 studies that focus on individuals at risk of homelessness. As such, this scoping review will not  
27  
28 explicitly search for articles that only include individuals at risk of homelessness. Instead, the charting  
29  
30 and analysis of the data will identify and contextualize social determinants of health and other factors  
31  
32 that put them at imminent risk of homelessness. Future reviews on rehabilitation that are focused  
33  
34 specifically on individuals at risk of homelessness, or specific populations at risk of homelessness, are  
35  
36 encouraged.  
37  
38  
39  
40  
41  
42  
43  
44

45 To the best of our knowledge, this is the first protocol for a scoping review on rehabilitation among  
46  
47 individuals who experience homelessness and TBI. This protocol is guided by scoping review  
48  
49 methodology frameworks to improve methodological rigour, which also addresses an identified  
50  
51 limitation of existing rehabilitation scoping review.[43] This protocol also describes a transparent  
52  
53 approach to comprehensively identify literature on rehabilitation and TBI among underserved  
54  
55 populations, which increases credibility and replicability. Importantly, intersecting sex, gender, social  
56  
57  
58  
59



1 identities, and vulnerabilities, which are often overlooked in the literature, will be considered in the  
2 charting of the data, analysis, and reporting of findings. Findings from the scoping review will provide  
3 an evidence-based foundation to inform (a) opportunities to integrate rehabilitation for TBI for  
4 individuals experiencing homelessness, (b) considerations for existing clinical and practice guidelines,  
5 and (c) recommendations future research.  
6  
7  
8  
9  
10  
11  
12  
13  
14  
15  
16  
17  
18  
19  
20  
21  
22  
23  
24  
25  
26  
27  
28  
29  
30  
31  
32  
33  
34  
35  
36  
37  
38  
39  
40  
41  
42  
43  
44  
45  
46  
47  
48  
49  
50  
51  
52  
53  
54  
55  
56  
57  
58  
59  
60

## REFERENCES

1. Affordable Housing, Inclusive Economic Policies Key to Ending Homelessness, Speakers Say as Social Development Commission Begins Annual Session [press release]. February 10, 2020 2020.
2. Stephen Gaetz ED, Tim Richter, & Melanie Redman. *The State of Homelessness in Canada 2016*. Toronto; 2016.
3. Strobel S, Burcul I, Dai JH, Ma Z, Jamani S, Hossain R. Characterizing people experiencing homelessness and trends in homelessness using population-level emergency department visit data in Ontario, Canada. *Health reports*. 2021;32(1):13-23.
4. Homelessness CAtE, Research N. One in five Canadians have a friend or acquaintance who has been homeless; majority support building new affordable housing. 2020.
5. Hwang SW. Homelessness and health. *Canadian Medical Association Journal*. 2001;164(2):229-33.
6. Frankish CJ, Hwang SW, Quantz D. Homelessness and health in Canada: research lessons and priorities. *Canadian journal of public health = Revue canadienne de sante publique*. 2005;96 Suppl 2(Suppl 2):S23-9.
7. Aldridge RW, Story A, Hwang SW, Nordentoft M, Luchenski SA, Hartwell G, et al. Morbidity and mortality in homeless individuals, prisoners, sex workers, and individuals with substance use disorders in high-income countries: a systematic review and meta-analysis. *The Lancet*. 2018;391(10117):241-50.
8. Menon DK, Schwab K, Wright DW, Maas AI. Position statement: definition of traumatic brain injury. *Archives of physical medicine and rehabilitation*. 2010;91(11):1637-40.
9. Rubiano AM, Carney N, Chesnut R, Puyana JC. Global neurotrauma research challenges and opportunities. *Nature*. 2015;527(7578):S193-S7.
10. Stubbs JL, Thornton AE, Sevick JM, Silverberg ND, Barr AM, Honer WG, et al. Traumatic brain injury in homeless and marginally housed individuals: a systematic review and meta-analysis. *The Lancet Public health*. 2020;5(1):e19-e32.
11. Stubbs JL, Thornton AE, Gicas KM, O'Connor TA, Livingston EM, Lu HY, et al. Characterizing Traumatic Brain Injury and Its Association with Losing Stable Housing in a Community-based Sample : Caractérisation d'une lésion cérébrale traumatique et de son association avec la perte d'un logement stable dans un échantillon communautaire. *Canadian journal of psychiatry Revue canadienne de psychiatrie*. 2021:7067437211000665.
12. Topolovec-Vranic J, Ennis N, Colantonio A, Cusimano MD, Hwang SW, Kontos P, et al. Traumatic brain injury among people who are homeless: a systematic review. *BMC public health*. 2012;12:1059.
13. Ponsford JL, Downing MG, Olver J, Ponsford M, Acher R, Carty M, et al. Longitudinal follow-up of patients with traumatic brain injury: outcome at two, five, and ten years post-injury. *Journal of neurotrauma*. 2014;31(1):64-77.
14. Ruet A, Bayen E, Jourdan C, Ghout I, Meaude L, Lalanne A, et al. A Detailed Overview of Long-Term Outcomes in Severe Traumatic Brain Injury Eight Years Post-injury. *Frontiers in neurology*. 2019;10:120.
15. Ahman S, Saveman BI, Styrke J, Björnstig U, Stålnacke BM. Long-term follow-up of patients with mild traumatic brain injury: a mixed-method study. *Journal of rehabilitation medicine*. 2013;45(8):758-64.

16. Perry DC, Sturm VE, Peterson MJ, Pieper CF, Bullock T, Boeve BF, et al. Association of traumatic brain injury with subsequent neurological and psychiatric disease: a meta-analysis. *Journal of neurosurgery*. 2016;124(2):511-26.
17. Scholten AC, Haagsma JA, Cnossen MC, Olff M, van Beeck EF, Polinder S. Prevalence of and Risk Factors for Anxiety and Depressive Disorders after Traumatic Brain Injury: A Systematic Review. *Journal of neurotrauma*. 2016;33(22):1969-94.
18. Hwang SW, Colantonio A, Chiu S, Tolomiczenko G, Kiss A, Cowan L, et al. The effect of traumatic brain injury on the health of homeless people. *Canadian Medical Association Journal*. 2008;179(8):779-84.
19. To MJ, O'Brien K, Palepu A, Hubley AM, Farrell S, Aubry T, et al. Healthcare Utilization, Legal Incidents, and Victimization Following Traumatic Brain Injury in Homeless and Vulnerably Housed Individuals: A Prospective Cohort Study. *J Head Trauma Rehabil*. 2015;30(4):270-6.
20. Gaetz S, Barr C, Friesen A, Harris B, Hill C, Kovacs-Burns K, et al. *Canadian Definition of Homelessness*. Toronto; 2012.
21. Svoboda T, Ramsay JT. High rates of head injury among homeless and low-income housed men: a retrospective cohort study. *Emergency medicine journal : EMJ*. 2014;31(7):571-5.
22. Adshead CD, Norman A, Holloway M. The inter-relationship between acquired brain injury, substance use and homelessness; the impact of adverse childhood experiences: an interpretative phenomenological analysis study. *Disability and rehabilitation*. 2019:1-13.
23. World Health O. Access to rehabilitation in primary health care: an ongoing challenge. Geneva: World Health Organization; 2018 2018. Contract No.: WHO/HIS/SDS/2018.40.
24. Gordon WA, Zafonte R, Cicerone K, Cantor J, Brown M, Lombard L, et al. Traumatic brain injury rehabilitation: state of the science. *American journal of physical medicine & rehabilitation*. 2006;85(4):343-82.
25. Teasell R, Marshall S, Cullen N, Bayley M, Rees L, Weiser M, et al. Evidence-based review of moderate to severe acquired brain injury (ERABI) version 13. 2019.
26. Lamontagne M-E, Truchon C, Kagan C, Bayley M, Swaine B, Marshall S, et al. INESSS-ONF clinical practice guidelines for the rehabilitation of adults having sustained a moderate-to-severe TBI2017.
27. Pottie K, Kendall CE, Aubry T, Magwood O, Andermann A, Salvaggio G, et al. Clinical guideline for homeless and vulnerably housed people, and people with lived homelessness experience. *Canadian Medical Association Journal*. 2020;192(10):E240.
28. Markowitz FE, Syverson J. Race, Gender, and Homelessness Stigma: Effects of Perceived Blameworthiness and Dangerousness. *Deviant Behavior*. 2019:1-12.
29. Weisz C, Quinn DM. Stigmatized Identities, Psychological Distress, and Physical Health: Intersections of Homelessness and Race. *Stigma and health (Washington, DC)*. 2018;3(3):229-40.
30. Whitzman C. At the Intersection of Invisibilities: Canadian women, homelessness and health outside the 'big city'. *Gender, Place & Culture*. 2006;13(4):383-99.
31. Colantonio A. Sex, Gender, and Traumatic Brain Injury: A Commentary. *Archives of physical medicine and rehabilitation*. 2016;97(2):S1-S4.
32. Arksey H, O'Malley L. Scoping studies: towards a methodological framework. *International Journal of Social Research Methodology*. 2005;8(1):19-32.
33. Levac D, Colquhoun H, O'Brien KK. Scoping studies: advancing the methodology. *Implementation Science*. 2010;5(1):69.

- 1  
2 34. Tricco AC, Lillie E, Zarin W, O'Brien KK, Colquhoun H, Levac D, et al. PRISMA Extension for  
3 Scoping Reviews (PRISMA-ScR): Checklist and Explanation. *Annals of internal medicine*.  
4 2018;169(7):467-73.  
5  
6 35. Rehabilitation: World Health Organization; 2021 [Available from: [https://www.who.int/news-](https://www.who.int/news-room/fact-sheets/detail/rehabilitation)  
7 [room/fact-sheets/detail/rehabilitation](https://www.who.int/news-room/fact-sheets/detail/rehabilitation).  
8  
9 36. Reed N, Zemek R, Dawson J, Ledoux A-A, Provvidenza C, Paniccia M, et al. Living guideline for  
10 diagnosing and managing pediatric concussion. 2021 March 1, 2021.  
11  
12 37. Innovation VH. Covidence systematic review software. Melbourne, Australia.  
13 38. Canada WaGE. What is Gender-based Analysis Plus 2021 [updated April 14, 2021. Available  
14 from: [https://women-gender-equality.canada.ca/en/gender-based-analysis-plus/what-gender-based-](https://women-gender-equality.canada.ca/en/gender-based-analysis-plus/what-gender-based-analysis-plus.html)  
15 [analysis-plus.html](https://women-gender-equality.canada.ca/en/gender-based-analysis-plus/what-gender-based-analysis-plus.html).  
16  
17 39. Hsieh H-F, Shannon SE. Three Approaches to Qualitative Content Analysis. *Qualitative Health*  
18 *Research*. 2005;15(9):1277-88.  
19 40. Vaismoradi M, Snelgrove S. **Theme in Qualitative Content Analysis and Thematic Analysis.**  
20 *Forum Qualitative Sozialforschung / Forum: Qualitative Social Research*. 2019;20(3):1-14.  
21 41. National Heart L, and Blood Institute. Background: Development and use of study quality  
22 assessment tools [Available from: <http://nhlbi.nih.gov/node/80102>.  
23  
24 42. Argintaru N, Chambers C, Gogosis E, Farrell S, Palepu A, Klodawsky F, et al. A cross-sectional  
25 observational study of unmet health needs among homeless and vulnerably housed adults in three  
26 Canadian cities. *BMC public health*. 2013;13(1):577.  
27  
28 43. Colquhoun HL, Jesus TS, O'Brien KK, Tricco AC, Chui A, Zarin W, et al. Scoping Review on  
29 Rehabilitation Scoping Reviews. *Archives of physical medicine and rehabilitation*. 2020;101(8):1462-9.  
30  
31  
32  
33  
34  
35  
36  
37  
38  
39  
40  
41  
42  
43  
44  
45  
46  
47  
48  
49  
50  
51  
52  
53  
54  
55  
56  
57  
58  
59  
60

## **AUTHORS' CONTRIBUTIONS**

VC and AC conceptualized the study. VC, JE, and JB developed the search strategy. VC and JE formulated the design and drafted the manuscript. All authors critically reviewed the manuscript and approved the final manuscript.

## **ACKNOWLEDGMENTS**

The authors would like to thank Ms. Samira Omar, PhD Candidate at the Rehabilitation Sciences Institute, University of Toronto, for reviewing the final manuscript and providing editorial feedback.

## **FUNDING STATEMENT**

This work was supported by a Canada Research Chair (Tier 1) in Traumatic Brain Injury in Underserved Populations awarded to Dr. Angela Colantonio (Fund Number N/A).

## **COMPETING INTERESTS**

None declared.

## Supplementary File 1

### Search Description

This strategy was first developed in Medline, and was then translated to other databases. It uses the following concepts:

- Concept A (lines 1-15): Homelessness
- Concept B (lines 17-42): Rehabilitation
- Concept C (lines 44-55): Traumatic brain injury or cognitive impairment

The search conducted is: (A + B) OR (A + C). This strategy was used in all searched databases. Searches were also limited to human studies when possible. No date or language limits were applied.

### Search Strategy

Database: Ovid MEDLINE(R) ALL <1946 to April 20, 2021>

1 exp Homeless persons/  
 2 homeless\*.tw,kf.  
 3 Roofless\*.tw,kf.  
 4 (Marginal\* adj3 hous\*).tw,kf.  
 5 (precarious\* adj3 hous\*).tw,kf.  
 6 (unstabl\* adj3 hous\*).tw,kf.  
 7 (instab\* adj3 hous\*).tw,kf.  
 8 (interim\* adj3 hous\*).tw,kf.  
 9 (temporary adj3 (liv\* or hous\*)).tw,kf.  
 10 ((liv\* or sleep\* or stay or emergenc\*) adj3 shelter??).tw,kf.  
 11 houseless\*.tw,kf.  
 12 unsheltered.tw,kf.  
 13 rough sleeper?.tw,kf.  
 14 rough sleeping.tw,kf.  
 15 provisionally accommodat\*.tw,kf.  
 16 or/1-15  
 17 "Physical and Rehabilitation Medicine"/  
 18 exp rehabilitation/  
 19 rehab\*.tw,kf,jw.  
 20 telerehab\*.tw,kf,jw.  
 21 neurorehab\*.tw,kf,jw.  
 22 rh.fs.  
 23 Rehabilitation Centers/  
 24 (physiatrist? or physiatry).tw,kf.  
 25 occupational therapy/  
 26 (occupational adj therap\*).tw,kf,jw.  
 27 physical therapy specialty/  
 28 (physical adj therap\*).tw,kf,jw.  
 29 physiotherap\*.tw,kf,jw.  
 30 physio-therapist\*.tw,kf,jw.  
 31 Speech-Language Pathology/  
 32 (speech adj2 (therap\* or patholog\*)).tw,kf,jw.  
 33 Neuropsychology/

1  
 2 34 Neuropsycholog\*.tw,kf,jw.  
 3 35 Nutritionists/  
 4 36 (Nutritionist? or Dietician?).tw,kf,jw.  
 5 37 (therap\* adj recreation\*).tw,kf,jw.  
 6 38 child life specialist?.tw,kf.  
 7 39 play therapy/  
 8 40 (play adj therap\*).tw,kf.  
 9 41 Respite Care/  
 10 42 respite.tw,kf.  
 11 43 or/17-42  
 12 44 exp Brain Injuries/  
 13 45 exp Brain Injuries, Traumatic/  
 14 46 exp Brain Concussion/  
 15 47 Craniocerebral Trauma/  
 16 48 tbi\*2.tw,kf.  
 17 49 mtbi\*2.tw,kf.  
 18 50 concuss\*.tw,kf.  
 19 51 postconcuss\*.tw,kf.  
 20 52 ((head\* or brain\* or cerebr\* or crani\* or skull\* or intracran\*) adj2 (injur\* or trauma\* or damag\*  
 21 or wound\* or swell\* or oedema\* or edema\* or fracture\* or contusion\* or pressur\*)).tw,kf,jw.  
 22 53 ((brain\* or cerebr\* or intracerebr\* or crani\* or intracran\* or head\* or subdural\* or epidural\* or  
 23 extradural\*) adj (haematoma\* or hematoma\* or hemorrhag\* or haemorrhag\* or bleed\*)).tw,kf.  
 24 54 exp cognition disorders/  
 25 55 ((cogniti\* or neurocogniti\*) adj2 (impair\* or dysfunction\* or disorder\* or declin\*)).tw,kf.  
 26 56 or/44-55  
 27 57 16 and 43  
 28 58 16 and 56  
 29 59 57 or 58  
 30 60 59 not (exp animals/ not humans.sh.)

### Grey Literature

Reports from the following brain injury, housing, and rehabilitation organizations will be searched:

- American Academy of Physical Medicine and Rehabilitation
- Canadian Alliance to End Homelessness
- Canadian Housing First Toolkit
- Centre for Urban Health Solutions
- Cochrane Methods Equity Homeless Health Guidelines
- Evidence Exchange Network for Mental Health Addictions
- Mental Health Commission of Canada
- Model Systems Knowledge Translation Center
- National Association of State Head Injury
- National Health Care for the Homeless Council
- National Institute on Disability, Independent Living and Rehabilitation Research (NIDILRR)
- National Rehabilitation Information Center
- Ruff Institute of Global Homelessness

1  
2  
3  
4  
5  
6  
7  
8  
9  
10  
11  
12  
13  
14  
15  
16  
17  
18  
19  
20  
21  
22  
23  
24  
25  
26  
27  
28  
29  
30  
31  
32  
33  
34  
35  
36  
37  
38  
39  
40  
41  
42  
43  
44  
45  
46  
47  
48  
49  
50  
51  
52  
53  
54  
55  
56  
57  
58  
59  
60

- The Center for Brain Injury Research and Training
- The Homeless Hub
- Toronto Alliance to End Homelessness
- Toronto Mental Health and Addictions Supportive Housing Network
- Wellesley Institute

For peer review only



**PRISMA-P (Preferred Reporting Items for Systematic review and Meta-Analysis Protocols) 2015 checklist: recommended items to address in a systematic review protocol\***

| Section and topic                                       | Item No | Checklist item                                                                                                                                                                                                                |
|---------------------------------------------------------|---------|-------------------------------------------------------------------------------------------------------------------------------------------------------------------------------------------------------------------------------|
| <b>ADMINISTRATIVE INFORMATION</b>                       |         |                                                                                                                                                                                                                               |
| Title:                                                  |         |                                                                                                                                                                                                                               |
| Identification <b>PAGE 1 (SCOPING REVIEW)</b>           | 1a      | Identify the report as a protocol of a systematic review                                                                                                                                                                      |
| Update <b>N/A</b>                                       | 1b      | If the protocol is for an update of a previous systematic review, identify as such                                                                                                                                            |
| Registration <b>N/A</b>                                 | 2       | If registered, provide the name of the registry (such as PROSPERO) and registration number                                                                                                                                    |
| Authors:                                                |         |                                                                                                                                                                                                                               |
| Contact <b>PAGE 1</b>                                   | 3a      | Provide name, institutional affiliation, e-mail address of all protocol authors; provide physical mailing address of corresponding author                                                                                     |
| Contributions <b>PAGE 24</b>                            | 3b      | Describe contributions of protocol authors and identify the guarantor of the review                                                                                                                                           |
| Amendments <b>N?A</b>                                   | 4       | If the protocol represents an amendment of a previously completed or published protocol, identify as such and list changes; otherwise, state plan for documenting important protocol amendments                               |
| Support:                                                |         |                                                                                                                                                                                                                               |
| Sources <b>PAGE 24</b>                                  | 5a      | Indicate sources of financial or other support for the review                                                                                                                                                                 |
| Sponsor <b>PAGE 24</b>                                  | 5b      | Provide name for the review funder and/or sponsor                                                                                                                                                                             |
| Role of sponsor or funder <b>PAGE 24</b>                | 5c      | Describe roles of funder(s), sponsor(s), and/or institution(s), if any, in developing the protocol                                                                                                                            |
| <b>INTRODUCTION</b>                                     |         |                                                                                                                                                                                                                               |
| Rationale <b>PAGE 4-7</b>                               | 6       | Describe the rationale for the review in the context of what is already known                                                                                                                                                 |
| Objectives <b>PAGE 7</b>                                | 7       | Provide an explicit statement of the question(s) the review will address with reference to participants, interventions, comparators, and outcomes (PICO)                                                                      |
| <b>METHODS</b>                                          |         |                                                                                                                                                                                                                               |
| Eligibility criteria <b>PAGE 11-12</b>                  | 8       | Specify the study characteristics (such as PICO, study design, setting, time frame) and report characteristics (such as years considered, language, publication status) to be used as criteria for eligibility for the review |
| Information sources <b>PAGE 10-11</b>                   | 9       | Describe all intended information sources (such as electronic databases, contact with study authors, trial registers or other grey literature sources) with planned dates of coverage                                         |
| Search strategy <b>PAGE 10-11, SUPPLEMENTARY FILE 1</b> | 10      | Present draft of search strategy to be used for at least one electronic database, including planned limits, such that it could be repeated                                                                                    |

1  
2  
3  
4  
5  
6  
7  
8  
9  
10  
11  
12  
13  
14  
15  
16  
17  
18  
19  
20  
21  
22  
23  
24  
25  
26  
27  
28  
29  
30  
31  
32  
33  
34  
35  
36  
37  
38  
39  
40  
41  
42  
43  
44  
45  
46

---

|                                                   |     |                                                                                                                                                                                                                                                     |
|---------------------------------------------------|-----|-----------------------------------------------------------------------------------------------------------------------------------------------------------------------------------------------------------------------------------------------------|
| Study records:                                    |     |                                                                                                                                                                                                                                                     |
| Data management <b>PAGE 12</b>                    | 11a | Describe the mechanism(s) that will be used to manage records and data throughout the review                                                                                                                                                        |
| Selection process <b>PAGE 12</b>                  | 11b | State the process that will be used for selecting studies (such as two independent reviewers) through each phase of the review (that is, screening, eligibility and inclusion in meta-analysis)                                                     |
| Data collection process <b>PAGE 12-16</b>         | 11c | Describe planned method of extracting data from reports (such as piloting forms, done independently, in duplicate), any processes for obtaining and confirming data from investigators                                                              |
| Data items <b>PAGE 12-16</b>                      | 12  | List and define all variables for which data will be sought (such as PICO items, funding sources), any pre-planned data assumptions and simplifications                                                                                             |
| Outcomes and prioritization <b>PAGE 16-17</b>     | 13  | List and define all outcomes for which data will be sought, including prioritization of main and additional outcomes, with rationale                                                                                                                |
| Risk of bias in individual studies <b>PAGE 17</b> | 14  | Describe anticipated methods for assessing risk of bias of individual studies, including whether this will be done at the outcome or study level, or both; state how this information will be used in data synthesis                                |
| Data synthesis <b>PAGE 17</b>                     | 15a | Describe criteria under which study data will be quantitatively synthesised                                                                                                                                                                         |
| <b>PAGE 17</b>                                    | 15b | If data are appropriate for quantitative synthesis, describe planned summary measures, methods of handling data and methods of combining data from studies, including any planned exploration of consistency (such as I <sup>2</sup> , Kendall's τ) |
| <b>N/A</b>                                        | 15c | Describe any proposed additional analyses (such as sensitivity or subgroup analyses, meta-regression)                                                                                                                                               |
| <b>PAGE 17</b>                                    | 15d | If quantitative synthesis is not appropriate, describe the type of summary planned                                                                                                                                                                  |
| Meta-bias(es) <b>N/A</b>                          | 16  | Specify any planned assessment of meta-bias(es) (such as publication bias across studies, selective reporting within studies)                                                                                                                       |
| Confidence in cumulative evidence <b>N/A</b>      | 17  | Describe how the strength of the body of evidence will be assessed (such as GRADE)                                                                                                                                                                  |

---

**\* It is strongly recommended that this checklist be read in conjunction with the PRISMA-P Explanation and Elaboration (cite when available) for important clarification on the items. Amendments to a review protocol should be tracked and dated. The copyright for PRISMA-P (including checklist) is held by the PRISMA-P Group and is distributed under a Creative Commons Attribution Licence 4.0.**

*From: Shamseer L, Moher D, Clarke M, Ghersi D, Liberati A, Petticrew M, Shekelle P, Stewart L, PRISMA-P Group. Preferred reporting items for systematic review and meta-analysis protocols (PRISMA-P) 2015: elaboration and explanation. BMJ. 2015 Jan 2;349(jan02 1):g7647.*

# BMJ Open

## Protocol for a scoping review on rehabilitation among individuals who experience homelessness and traumatic brain injury

|                                 |                                                                                                                                                                                                                                                                                                                                                                                                                      |
|---------------------------------|----------------------------------------------------------------------------------------------------------------------------------------------------------------------------------------------------------------------------------------------------------------------------------------------------------------------------------------------------------------------------------------------------------------------|
| Journal:                        | <i>BMJ Open</i>                                                                                                                                                                                                                                                                                                                                                                                                      |
| Manuscript ID                   | bmjopen-2021-052942.R2                                                                                                                                                                                                                                                                                                                                                                                               |
| Article Type:                   | Protocol                                                                                                                                                                                                                                                                                                                                                                                                             |
| Date Submitted by the Author:   | 14-Oct-2021                                                                                                                                                                                                                                                                                                                                                                                                          |
| Complete List of Authors:       | Chan, Vincy; Toronto Rehabilitation Institute, KITE; University of Toronto, Rehabilitation Sciences Institute<br>Estrella, Maria Jennifer; University of Toronto, Department of Occupational Science & Occupational Therapy<br>Babineau, Jessica; Toronto Rehabilitation Institute, Research<br>Colantonio, Angela; University of Toronto, Rehabilitation Science Institute ; Toronto Rehabilitation Institute, KITE |
| <b>Primary Subject Heading</b>: | Rehabilitation medicine                                                                                                                                                                                                                                                                                                                                                                                              |
| Secondary Subject Heading:      | Public health, Rehabilitation medicine                                                                                                                                                                                                                                                                                                                                                                               |
| Keywords:                       | PUBLIC HEALTH, REHABILITATION MEDICINE, TRAUMA MANAGEMENT                                                                                                                                                                                                                                                                                                                                                            |
|                                 |                                                                                                                                                                                                                                                                                                                                                                                                                      |

SCHOLARONE™  
Manuscripts



I, the Submitting Author has the right to grant and does grant on behalf of all authors of the Work (as defined in the below author licence), an exclusive licence and/or a non-exclusive licence for contributions from authors who are: i) UK Crown employees; ii) where BMJ has agreed a CC-BY licence shall apply, and/or iii) in accordance with the terms applicable for US Federal Government officers or employees acting as part of their official duties; on a worldwide, perpetual, irrevocable, royalty-free basis to BMJ Publishing Group Ltd ("BMJ") its licensees and where the relevant Journal is co-owned by BMJ to the co-owners of the Journal, to publish the Work in this journal and any other BMJ products and to exploit all rights, as set out in our [licence](#).

The Submitting Author accepts and understands that any supply made under these terms is made by BMJ to the Submitting Author unless you are acting as an employee on behalf of your employer or a postgraduate student of an affiliated institution which is paying any applicable article publishing charge ("APC") for Open Access articles. Where the Submitting Author wishes to make the Work available on an Open Access basis (and intends to pay the relevant APC), the terms of reuse of such Open Access shall be governed by a Creative Commons licence – details of these licences and which [Creative Commons](#) licence will apply to this Work are set out in our licence referred to above.

Other than as permitted in any relevant BMJ Author's Self Archiving Policies, I confirm this Work has not been accepted for publication elsewhere, is not being considered for publication elsewhere and does not duplicate material already published. I confirm all authors consent to publication of this Work and authorise the granting of this licence.

1  
2 **Protocol for a scoping review on rehabilitation among individuals who experience homelessness**  
3  
4 **and traumatic brain injury**  
5  
6  
7

8  
9 Vincy Chan, PhD<sup>1-3</sup>, Maria Jennifer Estrella, MScOT<sup>4</sup>, Jessica Babineau, MLIS<sup>5</sup>, Angela Colantonio,  
10  
11 PhD<sup>1,2,3,4</sup>  
12  
13  
14

- 15  
16 1. KITE-Toronto Rehabilitation Institute, University Health Network, Toronto, Ontario, Canada
- 17  
18 2. Institute of Health Policy, Management and Evaluation, University of Toronto, Toronto,  
19  
20 Ontario, Canada
- 21  
22 3. Rehabilitation Sciences Institute, University of Toronto, Toronto, Ontario, Canada
- 23  
24 4. Department of Occupational Science & Occupational Therapy, University of Toronto, Toronto,  
25  
26 Ontario, Canada
- 27  
28 5. Library & Information Services, University Health Network, Toronto, Ontario, Canada  
29  
30  
31  
32  
33  
34  
35

36 Correspondence to:

37  
38 Dr. Vincy Chan

39  
40 KITE-Toronto Rehabilitation Institute, University Health Network

41  
42 550 University Avenue, Toronto, ON, M5G 2A2

43  
44 [vincy.chan@uhn.ca](mailto:vincy.chan@uhn.ca)

45  
46  
47 416-978-1250  
48  
49  
50  
51

52 **Word count:** 2989 (excluding Tables)  
53  
54  
55  
56  
57  
58  
59  
60

## ABSTRACT

**Introduction:** Rehabilitation is key to improving outcomes and quality of life after traumatic brain injury (TBI). However, individuals experiencing homelessness are rarely represented in research that informs evidence-based rehabilitation guidelines even though TBI is disproportionately prevalent among this population. This protocol is for a scoping review to explore the extent to which rehabilitation, including the types of rehabilitation interventions, is available to, or used by, individuals who experience homelessness and TBI to inform (a) opportunities to integrate rehabilitation for individuals who experience homelessness and TBI, (b) considerations for existing clinical and practice guidelines for rehabilitation, and (c) recommendations for future research.

**Methods and analysis:** The scoping review will be guided by six stages described in scoping review methodology frameworks. Electronic databases (MEDLINE, Embase and Embase Classic, Cochrane CENTRAL Register of Clinical Trials, CINAHL, APA PsycINFO, Applied Social Sciences Index and Abstracts, and Nursing and Allied Health), reference list of included articles and scoping or systematic reviews identified from the search, and grey literature, defined as reports from relevant brain injury, housing, and rehabilitation organizations, will be searched. Two reviewers will independently screen all articles based on pre-determined inclusion and exclusion criteria. A descriptive numerical summary of data items will be provided and qualitative content analytic techniques will be used to identify and report common themes. Preliminary findings will be shared with stakeholders to seek feedback on the implications of the results.

**Ethics and dissemination:** Ethics review will not be required, as only publicly available data will be analyzed. Findings from the scoping review will be published in a peer-reviewed journal and presented at scientific meetings and to stakeholders, defined as service providers in the housing and TBI sectors;

1  
2 health professionals who provide care for individuals with TBI and/or homelessness; health  
3  
4 administrators, decision-makers, and policy-makers; researchers; and caregivers or family members of  
5  
6 individuals with lived experience of TBI and homelessness.  
7  
8  
9

10  
11 **Registration details:** This protocol will be registered in the Open Science Framework (OSF)  
12  
13 Registries.  
14

15  
16  
17  
18 **Keywords:** Traumatic brain injury, Rehabilitation, Homelessness, Underserved population, Vulnerable  
19  
20 population  
21  
22  
23  
24  
25  
26  
27  
28  
29  
30  
31  
32  
33  
34  
35  
36  
37  
38  
39  
40  
41  
42  
43  
44  
45  
46  
47  
48  
49  
50  
51  
52  
53  
54  
55  
56  
57  
58  
59  
60

## STRENGTHS AND LIMITATIONS OF THIS STUDY

- To the best of our knowledge, this is the first scoping review of rehabilitation among individuals experiencing homelessness and TBI; findings will inform (a) opportunities to integrate rehabilitation for individuals who experience homelessness and TBI, (b) considerations for existing clinical and practice guidelines for rehabilitation, and (c) recommendations for future research
- This protocol is guided by scoping review methodology frameworks to improve methodological rigour, an identified limitation of existing rehabilitation scoping reviews, and describes a transparent approach to comprehensively identify literature on rehabilitation and TBI among underserved populations, which increases replicability
- Intersecting sex, gender, social identities, and vulnerabilities will be considered in the charting of the data, analysis, and reporting of findings
- We acknowledge the risk of publication bias because only peer-reviewed articles or published reports will be included
- To evaluate and report on the risk of publication bias, non-English articles will not be immediately excluded; the decision to include or exclude non-English language full-texts will be determined at the time of the review, taking into account the availability of resources and the proportion of non-English full-text articles



## INTRODUCTION

Homelessness is a global crisis affecting an estimated 100 million people worldwide and becoming increasingly prevalent in many countries.[1] In Canada, more than 200,000 individuals experience homelessness every year.[2] This number is based on a 2016 national report; however, recent studies suggest that the state of homelessness in the country is worsening.[3, 4] Individuals who experience homelessness suffer from a broad range of health concerns, including systemic disorders (e.g., chronic obstructive pulmonary disease, seizures, arthritis, musculoskeletal disorders, tuberculosis) and mental health conditions and substance use, all contributing to extremely high mortality rates.[5-7] Consistently underrecognized is traumatic brain injury (TBI). Defined as “an alteration in brain function or other evidence of brain pathology caused by an external force,”[8] TBI is a serious public health problem and the leading cause of death and disability among all trauma-related injuries globally.[9]

Approximately 1 in 2 individuals who are homeless or precariously housed experience a lifetime TBI while almost 1 in 4 individuals experience a moderate to severe TBI.[10] Evidence suggests that the relationship between TBI and homelessness is bidirectional, with TBI preceding and prolonging homelessness.[10-12] The first incidence of TBI was often found to occur before the onset of homelessness,[12] and moderate to severe TBI was associated with the initial loss of stable housing and a longer duration of homelessness and precarious housing.[11] Individuals with TBI often experience cognitive and behavioural challenges related to memory, attention, mental fatigue, and irritability; fatigue and balance problems; and an increased likelihood of developing neurologic and psychiatric conditions, all of which impact various areas of life and can be long-lasting or permanent.[13-17] Among those experiencing homelessness specifically, TBI has been found to be associated with poorer physical and mental health status, increased likelihood of seizures, mental health and substance use

1  
2 problems, higher risk for suicide, increased health service use, and increased criminal justice system  
3  
4 involvement.[10, 18, 19] TBI-specific challenges, combined with other physical and mental health  
5  
6 problems, and factors such as financial constraints and lack of social supports, lead to difficulties  
7  
8 maintaining housing and increase the risk for homelessness. As the literature suggests, homelessness is  
9  
10 a fluid experience characterized by frequent shifts in physical living situations (i.e., unsheltered,  
11  
12 emergency, and provisionally accommodated) and changes in housing status (i.e., at risk of  
13  
14 homelessness to experiencing homelessness).[20] If unaddressed, the effects of TBI and homelessness  
15  
16 combined could lead to a cycle of repeated TBIs, prolonged homelessness, and substantial economic  
17  
18 and health-related costs.[19, 21, 22]  
19  
20  
21  
22  
23  
24

25 The long-term negative outcomes of TBI, along with the intersecting challenges experienced by  
26  
27 individuals who experience homelessness, demand long-term specialized supports including  
28  
29 rehabilitation. Rehabilitation, defined as "a set of interventions designed to optimize functioning and  
30  
31 reduce disability in individuals with health conditions in interaction with their environment," has been  
32  
33 identified by the World Health Organization (WHO) as an integral part of the health care continuum;  
34  
35 when integrated with primary healthcare, rehabilitation can reduce disability, optimize the outcomes of  
36  
37 other interventions, and support full recovery.[23] Over the years, various rehabilitation interventions  
38  
39 have been found beneficial in managing TBI symptoms and facilitating outcomes such as community  
40  
41 integration and quality of life.[24, 25] The growing evidence base on TBI rehabilitation has informed  
42  
43 the development of evidence-based guidelines that provide comprehensive recommendations for TBI  
44  
45 care;[26] however, the research informing these guidelines do not sufficiently, if at all, represent  
46  
47 underserved populations, such as individuals experiencing homelessness. Further, while reviews on  
48  
49 TBI rehabilitation or clinical guidelines for homelessness exist,[24, 25, 27] there is none to date that  
50  
51 focuses on rehabilitation interventions across disciplines for individuals who experience homelessness  
52  
53 and TBI. This paucity of information suggests that existing evidence-based practice guidelines do not  
54  
55  
56  
57  
58  
59  
60

1  
2 reflect rehabilitation that are specific to the needs of individuals who experience homelessness and  
3  
4 TBI.  
5  
6  
7

8  
9 This protocol is for a scoping review that aims to address this gap, by exploring the extent to which  
10 rehabilitation, including types of rehabilitation interventions, is available to or used by individuals  
11 experiencing homelessness and TBI. This review will also aim to summarize findings across sex,  
12  
13 gender, and other identity factors (e.g., age, race, ethnicity, and disability). To date, there is a lack of  
14  
15 information across intersecting identities even though they contribute to unique experiences that cannot  
16  
17 be addressed by looking at a single facet of identity.[28-31] The results of the scoping review will  
18  
19 inform (a) opportunities to integrate rehabilitation for individuals who experience homelessness and  
20  
21 TBI, (b) considerations for existing clinical and practice guidelines, and (c) recommendations for future  
22  
23 research.  
24  
25  
26  
27  
28  
29  
30

## 31 32 **METHOD AND ANALYSIS** 33 34 35

36 The scoping review will be guided by six stages described in Arksey and O'Malley's scoping review  
37 methodology framework and Levac and colleagues' additional recommendations to this framework[32,  
38  
39 33] – (1) identifying the research question, (2) identifying relevant studies, (3) selecting studies, (4)  
40  
41 charting the data, (5) collating, summarizing, and reporting the results, and (6) consultation, which is an  
42  
43 optional stage. The reporting of the scoping review will follow the Preferred Reporting Items for  
44  
45 Systematic reviews and Meta-Analyses extension or Scoping Reviews (PRISMA-ScR).[34]  
46  
47  
48  
49  
50

### 51 52 *Stage 1: Identifying the research question* 53

54 The research question is: “To what extent is rehabilitation, including the types of rehabilitation  
55  
56 intervention, available to, or used by, individuals experiencing homelessness and TBI?” As  
57  
58  
59

rehabilitation encompasses a variety of disciplines and homelessness a variety of living situations, the following parameters and definitions will guide the scoping review, including the search strategy, study selection, charting of data, and reporting of findings.

Rehabilitation will be defined using (a) the WHO's definition[35] and (b) rehabilitation teams identified in evidence-based guidelines for TBI rehabilitation.[26, 36] Homelessness will be defined using the Canadian Observatory of Homelessness (COH, formerly the Canadian Homelessness Research Network) typology of homelessness that encompasses the following physical living situations at the time of the research study: (a) unsheltered, (b) emergency sheltered, and (c) provisionally accommodated.[20] Table 1 illustrates the parameters and associated definitions for rehabilitation and homelessness that will guide the review.

**Table 1.** Parameters and associated definitions for rehabilitation and homelessness.

| Concept          | Parameter                                                                                                                          | Definition                                                                                                                                                                                                                                                                                                                                                                                                                                             |
|------------------|------------------------------------------------------------------------------------------------------------------------------------|--------------------------------------------------------------------------------------------------------------------------------------------------------------------------------------------------------------------------------------------------------------------------------------------------------------------------------------------------------------------------------------------------------------------------------------------------------|
| Rehabilitation   | World Health Organization's definition of rehabilitation[35]                                                                       | "A set of interventions designed to optimize functioning and reduce disability in individuals with health conditions in interaction with their environment"                                                                                                                                                                                                                                                                                            |
|                  | Healthcare providers/professional disciplines identified in evidence-based clinical practice guidelines for rehabilitation[26, 36] | <ul style="list-style-type: none"> <li>• Speech-language pathologists</li> <li>• Occupational therapist</li> <li>• Physiotherapist</li> <li>• Social worker</li> <li>• Neuropsychologist and psychometrist</li> <li>• Psychologist with expertise in behavioural therapy</li> <li>• Nurse</li> <li>• Physician and/or psychiatrist</li> <li>• Rehabilitation support personnel</li> <li>• Nutritionist</li> <li>• Therapeutic recreationist</li> </ul> |
| Homelessness[20] | Unsheltered                                                                                                                        | Individuals who lack housing and are not accessing shelters: <ul style="list-style-type: none"> <li>• "Public or private spaces without consent or contract" or</li> <li>• "Places not intended for permanent human habitation"</li> </ul>                                                                                                                                                                                                             |

|  |                            |                                                                                                                                                                                                                                                                                                                                                                                                                                                                             |
|--|----------------------------|-----------------------------------------------------------------------------------------------------------------------------------------------------------------------------------------------------------------------------------------------------------------------------------------------------------------------------------------------------------------------------------------------------------------------------------------------------------------------------|
|  | Emergency sheltered        | <p>Individuals who cannot secure permanent housing and are accessing shelters or other system supports:</p> <ul style="list-style-type: none"> <li>• “Emergency overnight shelters for people who are homelessness” or</li> <li>• “Shelters for individuals/families impacted by family violence” or</li> <li>• “Emergency shelter for people fleeing a natural disaster or destruction of accommodation due to fires, floods, etc.”</li> </ul>                             |
|  | Provisionally accommodated | <p>Individuals without permanent shelter and are accessing accommodations that offer no prospect of permanent:</p> <ul style="list-style-type: none"> <li>• Interim housing</li> <li>• Living temporality with others</li> <li>• Accessing short-term, temporary rental without security of tenure</li> <li>• Living in institutional care and lack housing arrangements</li> <li>• Accommodation/reception centres for recently arrived immigrants and refugees</li> </ul> |

### *Stage 2: Identifying relevant studies*

The comprehensive database search strategy proposed in this protocol was developed with an Information Specialist (JB) and involved iterative revisions with research team members who possess research and subject-matter expertise relevant to rehabilitation, TBI, and homelessness (see Supplementary File 1). The search strategy is developed for the MEDLINE® ALL (in Ovid, including Epub Ahead of Print, In-Process & Other Non-Indexed Citations, Ovid MEDLINE(R) Daily) database, and will be translated to: Embase and Embase Classic (Ovid), Cochrane CENTRAL Register of Clinical Trials (Ovid), CINAHL (EBSCO), APA PsycINFO (Ovid), Applied Social Sciences Index and Abstracts (Proquest), and Nursing and Allied Health (Proquest).

The following concepts were developed to form the search strategy:

A. Homelessness

B. Rehabilitation

### C. TBI or cognitive impairment

The final search strategy structure, (A + B) OR (A + C), will be used to search each database. No language or date limits will be placed on search strategies. In addition to comprehensive and structured database searching, reference list of included articles and scoping or systematic review articles identified from the search, and grey literature, defined as reports from relevant brain injury, housing, and rehabilitation organizations will be searched (see Supplementary File 1).

#### *Stage 3: Study selection*

To be included in the scoping review, peer-reviewed articles, grey literature, and reference list of included primary research articles and scoping or systematic reviews must meet the following inclusion criteria:

- a) Describe and/or document rehabilitation and/or rehabilitation interventions that aim to optimize functioning and reduce disability in interaction with their environment or the delivery of care or describe and/or document rehabilitation services provided by healthcare providers/professional disciplines, as defined in Table 1;
- b) Focus on individuals who are experiencing homelessness at the time of the research study, as defined in Table 1;
- c) Include individuals with TBI; and
- d) Report primary research findings.

Dissertations, conference proceedings, and articles that are narrative, commentaries, or describe a theory or framework without reporting primary research findings will be excluded. Articles that look at the broader brain-injured population (e.g., acquired brain injury) or individuals with cognitive impairment without specific mention of TBI will also be excluded.

1  
2  
3  
4 Relevant studies retrieved using the above search strategy will be imported into EndNote X8.2 for  
5  
6 reference management and Covidence for deduplication and study selection.[37] Two reviewers will  
7  
8 independently screen all articles based on the above inclusion and exclusion criteria. At the title and  
9  
10 abstract screen, articles that do not explicitly mention cognitive impairment or TBI will be considered  
11  
12 for the full-text screen to confirm the study include individuals with TBI. Prior to formal screening,  
13  
14 pilot testing of 20 titles and abstracts will be conducted, until a minimum 80% agreement using the  
15  
16 kappa statistic is achieved between the reviewers. At the full-text review, pilot testing of 10% of the  
17  
18 full-text articles will be conducted until a minimum of 80% agreement is achieved between the  
19  
20 reviewers. Non-English language abstracts will be assessed using the published English abstract and  
21  
22 the decision to include these articles in the full-text articles will be determined at the time of the  
23  
24 review, considering the availability of resources and proportion of non-English full-text articles. Any  
25  
26 discrepancies during the study selection stage will be resolved by consensus or consultation with a third  
27  
28 reviewer. The study selection process will be presented using the Preferred Reporting Items for  
29  
30 Systematic Reviews and Meta Analyses flow chart.[34]  
31  
32  
33  
34  
35  
36  
37  
38  
39  
40

#### 41 *Stage 4: Charting the data*

42  
43 Table 2 presents the charting table for the scoping review, which will be continually refined, as  
44  
45 recommended by Levac and colleagues' methodology framework.[33] One reviewer will  
46  
47 independently complete the charting table for each study and the completed table will then be  
48  
49 independently peer-reviewed by a second reviewer. Similar to the study selection stage, charting of the  
50  
51 data will begin with a random sample of five articles until a minimum of 80% agreement is achieved  
52  
53 between the reviewers. Discrepancies in charting the data will be resolved by consensus or in  
54  
55 consultation with a third reviewer.  
56  
57  
58  
59  
60

Table 2. Charting table.

| <b>Data Item</b>      |                     | <b>Description</b>                                                                                                                                                                                                                                                                                                                                                                                                                                                                                                                                                        |
|-----------------------|---------------------|---------------------------------------------------------------------------------------------------------------------------------------------------------------------------------------------------------------------------------------------------------------------------------------------------------------------------------------------------------------------------------------------------------------------------------------------------------------------------------------------------------------------------------------------------------------------------|
| Study characteristics | Author              |                                                                                                                                                                                                                                                                                                                                                                                                                                                                                                                                                                           |
|                       | Year of publication |                                                                                                                                                                                                                                                                                                                                                                                                                                                                                                                                                                           |
|                       | Country of study    |                                                                                                                                                                                                                                                                                                                                                                                                                                                                                                                                                                           |
|                       | Type of article     | Note if the article was a peer-reviewed publication or grey literature                                                                                                                                                                                                                                                                                                                                                                                                                                                                                                    |
|                       | Study design        | Specify if the study was quantitative, qualitative, or mixed methods and describe the study design                                                                                                                                                                                                                                                                                                                                                                                                                                                                        |
|                       | Objective           | Describe the stated objective of the study                                                                                                                                                                                                                                                                                                                                                                                                                                                                                                                                |
| Study sample          | TBI                 | Specify the definition of TBI or how TBI was identified/determined<br><br>Specify the injury severity, time since injury, method of diagnosis/screening, timing of TBI relative to homelessness (e.g., whether TBI predated homelessness, if the individual was homeless at the time of TBI), and the sample (N, %) of individuals with TBI                                                                                                                                                                                                                               |
|                       | Homelessness        | Specify the definition of homelessness<br><br>Specify the sample (N, %) of individuals experiencing homelessness                                                                                                                                                                                                                                                                                                                                                                                                                                                          |
|                       | Age                 | Specify participants' age at the time of the study, at the time of TBI, and at the time of homelessness                                                                                                                                                                                                                                                                                                                                                                                                                                                                   |
|                       | Sex/Gender          | Specify if Sex- and Gender-Based Analysis Plus (SGBA+) was considered in the study design[38]<br><br>Note if and/or how sex and gender were defined in the study.<br><br>Specify the participants' sex and/or gender (N, %)                                                                                                                                                                                                                                                                                                                                               |
|                       | Sociodemographic    | Specify sociodemographic characteristics of the sample (e.g., race, ethnicity, religion, disability, geography, culture, income, education), including experiences consistent with those at risk of homelessness as defined in the COH [20]<br><br>Note if/describe how the sample of individuals with homelessness and TBI intersect with the criminal justice/legal system or experienced violence, including intimate partner violence<br><br>Note if/describe how the article acknowledged and/or accounted for intersecting social identities and/or vulnerabilities |
| Rehabilitation        | Intervention        | Describe the focus or goal of the intervention                                                                                                                                                                                                                                                                                                                                                                                                                                                                                                                            |



|  |                     |                                                                                                                                                                                                                                        |
|--|---------------------|----------------------------------------------------------------------------------------------------------------------------------------------------------------------------------------------------------------------------------------|
|  |                     | Describe the rehabilitation approach/type of rehabilitation intervention, how the intervention was delivered, the length or frequency of the intervention, and the setting of/location in which the intervention(s) was/were delivered |
|  |                     | Note the theories or principles of care that are guiding the intervention studied in the article                                                                                                                                       |
|  |                     | Note if/describe how the intervention acknowledged and/or accounted for intersecting social identities and vulnerabilities and housing status at the time of intervention                                                              |
|  | Rehabilitation team | List the healthcare providers/professional disciplines that were involved in the intervention or rehabilitation process                                                                                                                |
|  |                     | Note if the rehabilitation team collaborates with or have access to housing providers and other providers/disciplines not specified in Table 1                                                                                         |
|  | Outcome             | Describe the outcome of the intervention<br>Note any outcome(s) relevant to intersectionality                                                                                                                                          |
|  | Barriers            | Describe any stated barriers to rehabilitation for individuals experiencing homelessness and TBI                                                                                                                                       |
|  | Facilitators        | Describe any stated facilitators to rehabilitation for individuals experiencing homelessness and TBI                                                                                                                                   |
|  | Gaps                | Describe any stated gaps in research on rehabilitation for individuals experiencing homelessness and TBI                                                                                                                               |

### *Stage 5: Collating, summarizing, and reporting the results*

As recommended by Levac and colleagues' methodology framework,[33] stage 5 will follow three distinct steps that may be refined further towards the end of the review, based on the content of the included articles:

1. Analyzing the data – a descriptive numerical summary of study characteristics, study sample, rehabilitation, and barriers, facilitators, and gaps will be provided and qualitative content analytic techniques will be applied to inform steps 2 (reporting results) and 3 (applying meaning to the results);[39] this method of data analysis is appropriate for this review, as it allows for the quantification of data (i.e., taking into account the frequency of similar codes) in themes or category development.[40] Furthermore, we will assess the quality of the included studies using

- 1 the Study Quality Assessment Tools designed by methodologists from the Research Triangle  
2 Institute International and the National Heart, Lung, and Blood Institute of the National  
3  
4 Institutes of Health. These tools aim to assess the internal validity of a study, including sources  
5  
6 of bias, confounding, study power, and other factors [41], to critically appraise different study  
7  
8 designs. These quality assessments tools will be used to inform the process of applying meaning  
9  
10 to the results, specified in step 3. No articles will be eliminated based on the quality assessment.  
11  
12  
13  
14  
15  
16 2. Reporting results – findings will be reported in relation to the research question (the extent to  
17  
18 which rehabilitation, including the types of rehabilitation interventions, is available to, or used  
19  
20 by, individuals who experience homelessness and TBI).  
21  
22  
23 3. Applying meaning to the results – implications for (a) opportunities to integrate rehabilitation  
24  
25 for individuals who experience homelessness and TBI, (b) considerations for existing clinical  
26  
27 and practice guidelines for rehabilitation, and (c) recommendations for future research will be  
28  
29 considered.  
30  
31  
32  
33

#### 34 *Stage 6: Consultation*

35  
36 Preliminary findings from stage 5 will be shared with stakeholders of this scoping review to identify  
37  
38 additional literature and seek feedback on the implications of the review on (a) opportunities to  
39  
40 integrate rehabilitation for individuals who experience homelessness and TBI, (b) considerations for  
41  
42 existing clinical and practice guidelines for rehabilitation, and (c) recommendations for future research.  
43  
44 Stakeholders include front-line staff and service providers in the housing and brain injury sectors;  
45  
46 health administrators, decision-makers, and policy-makers; health professionals who provide care for  
47  
48 individuals with TBI and/or individuals who experience homelessness; researchers and trainees who  
49  
50 conduct research on rehabilitation, TBI, and homelessness; and caregivers or family members of  
51  
52 individuals with lived experience of TBI and/or homelessness.  
53  
54  
55  
56  
57  
58  
59  
60

## **Patient and public involvement**

Patients and the public were not involved in the creation of this scoping review protocol. However, stage 6 of our proposed methods will engage stakeholders of this scoping review.

## **Ethics and Dissemination**

Ethics review will not be required because only published and publicly available data will be analyzed.

The scoping review will be published in a peer-reviewed journal. Findings will be presented at scientific conferences and stakeholders defined in stage six of the scoping review.

## *Strengths and Limitations*

We acknowledge the risk of publication bias, as only peer-reviewed articles or published reports will be included. For example, pilot studies conducted as theses will not be captured in the scoping review unless they are published in peer-reviewed journals. However, this protocol aims to minimize publication bias by including non-English articles in the title and abstract screen using the published English version of the abstract. The decision to include or exclude non-English language full-texts will be determined at the time of the review, taking into account the availability of resources and proportion of non-English full-text articles. Furthermore, it is recognized that community organizations serving individuals experiencing homelessness and/or TBI may produce non-peer-reviewed reports of the services they offer. As such, grey literature, defined as reports published by brain injury, housing, and rehabilitation organizations, will also be searched. We also acknowledge that the inclusion of quality assessment deviates from the methodology frameworks used to inform this protocol [32, 33]. No studies will be excluded from this scoping review based on the quality assessment, however, results from the assessment will be considered when we apply meaning to the findings that are used to inform

1  
2 considerations for future research, the integration of rehabilitation, and clinical and best practices  
3  
4 guidelines. Finally, this scoping review will not explicitly search for articles that only focus on  
5  
6 individuals at risk of homelessness, defined as “people who are not homeless, but whose current  
7  
8 economic and/or housing situation is precarious or does not meet public health and safety  
9  
10 standard.”[20] For example, articles that focus on precariously employed individuals without explicit  
11  
12 mention of being unsheltered, emergency sheltered, and provisionally accommodated will not be  
13  
14 included in this review. We acknowledge that homelessness is a fluid experience, with similar factors  
15  
16 associated with unmet healthcare needs among those who are homeless and vulnerably housed. [42]  
17  
18 However, the goal of this scoping review is to explore the extent to which rehabilitation, including the  
19  
20 types of rehabilitation intervention, is available to, or used by individuals experiencing homelessness  
21  
22 and TBI. Rehabilitation studies focused on individuals with TBI who are unsheltered, emergency  
23  
24 sheltered, and provisionally accommodated at the time of the research study may describe a different  
25  
26 rehabilitation experience than studies that focus on individuals at risk of homelessness or individuals  
27  
28 with lived experience of homelessness who are in permanent housing. As such, this scoping review will  
29  
30 not explicitly search for articles that only include individuals at risk of homelessness or who are  
31  
32 currently in permanent housing. Instead, the charting and analysis of the data will identify and  
33  
34 contextualize social determinants of health and other factors that put them at imminent risk of  
35  
36 homelessness. It will also extract the definition of homelessness from the research study and note the  
37  
38 location of the intervention(s). Future reviews on rehabilitation that are focused specifically on  
39  
40 individuals at risk of homelessness, or specific populations at risk of homelessness, as well as studies  
41  
42 focused on individuals with lived experience of homelessness and are in permanent housing are  
43  
44 encouraged.

45  
46  
47  
48 To the best of our knowledge, this is the first protocol for a scoping review on rehabilitation among  
49  
50 individuals experiencing homelessness and TBI. This protocol is guided by scoping review  
51  
52  
53  
54

1 methodology frameworks to improve methodological rigour, which also addresses an identified  
2 limitation of existing rehabilitation scoping review.[43] This protocol also describes a transparent  
3 approach to comprehensively identify literature on rehabilitation and TBI among underserved  
4 populations, which increases credibility and replicability. Importantly, intersecting sex, gender, social  
5 identities, and vulnerabilities, which are often overlooked in the literature, will be considered in the  
6 charting of the data, analysis, and reporting of findings. Findings from the scoping review will provide  
7 an evidence-based foundation to inform (a) opportunities to integrate rehabilitation for TBI for  
8 individuals experiencing homelessness, (b) considerations for existing clinical and practice guidelines,  
9 and (c) recommendations future research.  
10  
11  
12  
13  
14  
15  
16  
17  
18  
19  
20  
21  
22  
23  
24  
25  
26  
27  
28  
29  
30  
31  
32  
33  
34  
35  
36  
37  
38  
39  
40  
41  
42  
43  
44  
45  
46  
47  
48  
49  
50  
51  
52  
53  
54  
55  
56  
57  
58  
59  
60

## REFERENCES

1. Affordable Housing, Inclusive Economic Policies Key to Ending Homelessness, Speakers Say as Social Development Commission Begins Annual Session [press release]. February 10, 2020 2020.
2. Stephen Gaetz ED, Tim Richter, & Melanie Redman. *The State of Homelessness in Canada 2016*. Toronto; 2016.
3. Strobel S, Burcul I, Dai JH, Ma Z, Jamani S, Hossain R. Characterizing people experiencing homelessness and trends in homelessness using population-level emergency department visit data in Ontario, Canada. *Health reports*. 2021;32(1):13-23.
4. Homelessness CAtE, Research N. One in five Canadians have a friend or acquaintance who has been homeless; majority support building new affordable housing. 2020.
5. Hwang SW. Homelessness and health. *Canadian Medical Association Journal*. 2001;164(2):229-33.
6. Frankish CJ, Hwang SW, Quantz D. Homelessness and health in Canada: research lessons and priorities. *Canadian journal of public health = Revue canadienne de sante publique*. 2005;96 Suppl 2(Suppl 2):S23-9.
7. Aldridge RW, Story A, Hwang SW, Nordentoft M, Luchenski SA, Hartwell G, et al. Morbidity and mortality in homeless individuals, prisoners, sex workers, and individuals with substance use disorders in high-income countries: a systematic review and meta-analysis. *The Lancet*. 2018;391(10117):241-50.
8. Menon DK, Schwab K, Wright DW, Maas AI. Position statement: definition of traumatic brain injury. *Archives of physical medicine and rehabilitation*. 2010;91(11):1637-40.
9. Rubiano AM, Carney N, Chesnut R, Puyana JC. Global neurotrauma research challenges and opportunities. *Nature*. 2015;527(7578):S193-S7.
10. Stubbs JL, Thornton AE, Sevick JM, Silverberg ND, Barr AM, Honer WG, et al. Traumatic brain injury in homeless and marginally housed individuals: a systematic review and meta-analysis. *The Lancet Public health*. 2020;5(1):e19-e32.
11. Stubbs JL, Thornton AE, Gicas KM, O'Connor TA, Livingston EM, Lu HY, et al. Characterizing Traumatic Brain Injury and Its Association with Losing Stable Housing in a Community-based Sample : Caractérisation d'une lésion cérébrale traumatique et de son association avec la perte d'un logement stable dans un échantillon communautaire. *Canadian journal of psychiatry Revue canadienne de psychiatrie*. 2021:7067437211000665.
12. Topolovec-Vranic J, Ennis N, Colantonio A, Cusimano MD, Hwang SW, Kontos P, et al. Traumatic brain injury among people who are homeless: a systematic review. *BMC public health*. 2012;12:1059.
13. Ponsford JL, Downing MG, Olver J, Ponsford M, Acher R, Carty M, et al. Longitudinal follow-up of patients with traumatic brain injury: outcome at two, five, and ten years post-injury. *Journal of neurotrauma*. 2014;31(1):64-77.
14. Ruet A, Bayen E, Jourdan C, Ghout I, Meaude L, Lalanne A, et al. A Detailed Overview of Long-Term Outcomes in Severe Traumatic Brain Injury Eight Years Post-injury. *Frontiers in neurology*. 2019;10:120.
15. Ahman S, Saveman BI, Styrke J, Björnstig U, Stålnacke BM. Long-term follow-up of patients with mild traumatic brain injury: a mixed-method study. *Journal of rehabilitation medicine*. 2013;45(8):758-64.

16. Perry DC, Sturm VE, Peterson MJ, Pieper CF, Bullock T, Boeve BF, et al. Association of traumatic brain injury with subsequent neurological and psychiatric disease: a meta-analysis. *Journal of neurosurgery*. 2016;124(2):511-26.
17. Scholten AC, Haagsma JA, Cnossen MC, Olff M, van Beeck EF, Polinder S. Prevalence of and Risk Factors for Anxiety and Depressive Disorders after Traumatic Brain Injury: A Systematic Review. *Journal of neurotrauma*. 2016;33(22):1969-94.
18. Hwang SW, Colantonio A, Chiu S, Tolomiczenko G, Kiss A, Cowan L, et al. The effect of traumatic brain injury on the health of homeless people. *Canadian Medical Association Journal*. 2008;179(8):779-84.
19. To MJ, O'Brien K, Palepu A, Hubley AM, Farrell S, Aubry T, et al. Healthcare Utilization, Legal Incidents, and Victimization Following Traumatic Brain Injury in Homeless and Vulnerably Housed Individuals: A Prospective Cohort Study. *J Head Trauma Rehabil*. 2015;30(4):270-6.
20. Gaetz S, Barr C, Friesen A, Harris B, Hill C, Kovacs-Burns K, et al. *Canadian Definition of Homelessness*. Toronto; 2012.
21. Svoboda T, Ramsay JT. High rates of head injury among homeless and low-income housed men: a retrospective cohort study. *Emergency medicine journal : EMJ*. 2014;31(7):571-5.
22. Adshead CD, Norman A, Holloway M. The inter-relationship between acquired brain injury, substance use and homelessness; the impact of adverse childhood experiences: an interpretative phenomenological analysis study. *Disability and rehabilitation*. 2019:1-13.
23. World Health O. Access to rehabilitation in primary health care: an ongoing challenge. Geneva: World Health Organization; 2018 2018. Contract No.: WHO/HIS/SDS/2018.40.
24. Gordon WA, Zafonte R, Cicerone K, Cantor J, Brown M, Lombard L, et al. Traumatic brain injury rehabilitation: state of the science. *American journal of physical medicine & rehabilitation*. 2006;85(4):343-82.
25. Teasell R, Marshall S, Cullen N, Bayley M, Rees L, Weiser M, et al. Evidence-based review of moderate to severe acquired brain injury (ERABI) version 13. 2019.
26. Lamontagne M-E, Truchon C, Kagan C, Bayley M, Swaine B, Marshall S, et al. INESSS-ONF clinical practice guidelines for the rehabilitation of adults having sustained a moderate-to-severe TBI2017.
27. Pottie K, Kendall CE, Aubry T, Magwood O, Andermann A, Salvaggio G, et al. Clinical guideline for homeless and vulnerably housed people, and people with lived homelessness experience. *Canadian Medical Association Journal*. 2020;192(10):E240.
28. Markowitz FE, Syverson J. Race, Gender, and Homelessness Stigma: Effects of Perceived Blameworthiness and Dangerousness. *Deviant Behavior*. 2019:1-12.
29. Weisz C, Quinn DM. Stigmatized Identities, Psychological Distress, and Physical Health: Intersections of Homelessness and Race. *Stigma and health (Washington, DC)*. 2018;3(3):229-40.
30. Whitzman C. At the Intersection of Invisibilities: Canadian women, homelessness and health outside the 'big city'. *Gender, Place & Culture*. 2006;13(4):383-99.
31. Colantonio A. Sex, Gender, and Traumatic Brain Injury: A Commentary. *Archives of physical medicine and rehabilitation*. 2016;97(2):S1-S4.
32. Arksey H, O'Malley L. Scoping studies: towards a methodological framework. *International Journal of Social Research Methodology*. 2005;8(1):19-32.
33. Levac D, Colquhoun H, O'Brien KK. Scoping studies: advancing the methodology. *Implementation Science*. 2010;5(1):69.

- 1  
2 34. Tricco AC, Lillie E, Zarin W, O'Brien KK, Colquhoun H, Levac D, et al. PRISMA Extension for  
3 Scoping Reviews (PRISMA-ScR): Checklist and Explanation. *Annals of internal medicine*.  
4 2018;169(7):467-73.  
5  
6 35. Rehabilitation: World Health Organization; 2021 [Available from: [https://www.who.int/news-](https://www.who.int/news-room/fact-sheets/detail/rehabilitation)  
7 [room/fact-sheets/detail/rehabilitation](https://www.who.int/news-room/fact-sheets/detail/rehabilitation).  
8  
9 36. Reed N, Zemek R, Dawson J, Ledoux A-A, Provvienza C, Paniccia M, et al. Living guideline for  
10 diagnosing and managing pediatric concussion. 2021 March 1, 2021.  
11  
12 37. Innovation VH. Covidence systematic review software. Melbourne, Australia.  
13 38. Canada WaGE. What is Gender-based Analysis Plus 2021 [updated April 14, 2021. Available  
14 from: [https://women-gender-equality.canada.ca/en/gender-based-analysis-plus/what-gender-based-](https://women-gender-equality.canada.ca/en/gender-based-analysis-plus/what-gender-based-analysis-plus.html)  
15 [analysis-plus.html](https://women-gender-equality.canada.ca/en/gender-based-analysis-plus/what-gender-based-analysis-plus.html).  
16  
17 39. Hsieh H-F, Shannon SE. Three Approaches to Qualitative Content Analysis. *Qualitative Health*  
18 *Research*. 2005;15(9):1277-88.  
19 40. Vaismoradi M, Snelgrove S. **Theme in Qualitative Content Analysis and Thematic Analysis.**  
20 *Forum Qualitative Sozialforschung / Forum: Qualitative Social Research*. 2019;20(3):1-14.  
21 41. National Heart L, and Blood Institute. Background: Development and use of study quality  
22 assessment tools [Available from: <http://nhlbi.nih.gov/node/80102>.  
23  
24 42. Argintaru N, Chambers C, Gogosis E, Farrell S, Palepu A, Klodawsky F, et al. A cross-sectional  
25 observational study of unmet health needs among homeless and vulnerably housed adults in three  
26 Canadian cities. *BMC public health*. 2013;13(1):577.  
27  
28 43. Colquhoun HL, Jesus TS, O'Brien KK, Tricco AC, Chui A, Zarin W, et al. Scoping Review on  
29 Rehabilitation Scoping Reviews. *Archives of physical medicine and rehabilitation*. 2020;101(8):1462-9.  
30  
31  
32  
33  
34  
35  
36  
37  
38  
39  
40  
41  
42  
43  
44  
45  
46  
47  
48  
49  
50  
51  
52  
53  
54  
55  
56  
57  
58  
59  
60



## **AUTHORS' CONTRIBUTIONS**

VC and AC conceptualized the study. VC, JE, and JB developed the search strategy. VC and JE formulated the design and drafted the manuscript. All authors critically reviewed the manuscript and approved the final manuscript.

## **ACKNOWLEDGMENTS**

The authors would like to thank Ms. Samira Omar, PhD Candidate at the Rehabilitation Sciences Institute, University of Toronto, for reviewing the final manuscript and providing editorial feedback.

## **FUNDING STATEMENT**

This work was supported by a Canada Research Chair (Tier 1) in Traumatic Brain Injury in Underserved Populations awarded to Dr. Angela Colantonio (Fund Number N/A).

## **COMPETING INTERESTS**

None declared.

## Supplementary File 1

### Search Description

This strategy was first developed in Medline, and was then translated to other databases. It uses the following concepts:

- Concept A (lines 1-15): Homelessness
- Concept B (lines 17-42): Rehabilitation
- Concept C (lines 44-55): Traumatic brain injury or cognitive impairment

The search conducted is: (A + B) OR (A + C). This strategy was used in all searched databases. Searches were also limited to human studies when possible. No date or language limits were applied.

### Search Strategy

Database: Ovid MEDLINE(R) ALL <1946 to April 20, 2021>

1 exp Homeless persons/  
 2 homeless\*.tw,kf.  
 3 Roofless\*.tw,kf.  
 4 (Marginal\* adj3 hous\*).tw,kf.  
 5 (precarious\* adj3 hous\*).tw,kf.  
 6 (unstabl\* adj3 hous\*).tw,kf.  
 7 (instab\* adj3 hous\*).tw,kf.  
 8 (interim\* adj3 hous\*).tw,kf.  
 9 (temporary adj3 (liv\* or hous\*)).tw,kf.  
 10 ((liv\* or sleep\* or stay or emergenc\*) adj3 shelter??).tw,kf.  
 11 houseless\*.tw,kf.  
 12 unsheltered.tw,kf.  
 13 rough sleeper?.tw,kf.  
 14 rough sleeping.tw,kf.  
 15 provisionally accommodat\*.tw,kf.  
 16 or/1-15  
 17 "Physical and Rehabilitation Medicine"/  
 18 exp rehabilitation/  
 19 rehab\*.tw,kf,jw.  
 20 telerehab\*.tw,kf,jw.  
 21 neurorehab\*.tw,kf,jw.  
 22 rh.fs.  
 23 Rehabilitation Centers/  
 24 (physiatrist? or physiatry).tw,kf.  
 25 occupational therapy/  
 26 (occupational adj therap\*).tw,kf,jw.  
 27 physical therapy specialty/  
 28 (physical adj therap\*).tw,kf,jw.  
 29 physiotherap\*.tw,kf,jw.  
 30 physio-therapist\*.tw,kf,jw.  
 31 Speech-Language Pathology/  
 32 (speech adj2 (therap\* or patholog\*)).tw,kf,jw.  
 33 Neuropsychology/

1  
 2 34 Neuropsycholog\*.tw,kf,jw.  
 3 35 Nutritionists/  
 4 36 (Nutritionist? or Dietician?).tw,kf,jw.  
 5 37 (therap\* adj recreation\*).tw,kf,jw.  
 6 38 child life specialist?.tw,kf.  
 7 39 play therapy/  
 8 40 (play adj therap\*).tw,kf.  
 9 41 Respite Care/  
 10 42 respite.tw,kf.  
 11 43 or/17-42  
 12 44 exp Brain Injuries/  
 13 45 exp Brain Injuries, Traumatic/  
 14 46 exp Brain Concussion/  
 15 47 Craniocerebral Trauma/  
 16 48 tbi\*2.tw,kf.  
 17 49 mtbi\*2.tw,kf.  
 18 50 concuss\*.tw,kf.  
 19 51 postconcuss\*.tw,kf.  
 20 52 ((head\* or brain\* or cerebr\* or crani\* or skull\* or intracran\*) adj2 (injur\* or trauma\* or damag\*  
 21 or wound\* or swell\* or oedema\* or edema\* or fracture\* or contusion\* or pressur\*)).tw,kf,jw.  
 22 53 ((brain\* or cerebr\* or intracerebr\* or crani\* or intracran\* or head\* or subdural\* or epidural\* or  
 23 extradural\*) adj (haematoma\* or hematoma\* or hemorrhag\* or haemorrhag\* or bleed\*)).tw,kf.  
 24 54 exp cognition disorders/  
 25 55 ((cogniti\* or neurocogniti\*) adj2 (impair\* or dysfunction\* or disorder\* or declin\*)).tw,kf.  
 26 56 or/44-55  
 27 57 16 and 43  
 28 58 16 and 56  
 29 59 57 or 58  
 30 60 59 not (exp animals/ not humans.sh.)

### Grey Literature

Reports from the following brain injury, housing, and rehabilitation organizations will be searched:

- American Academy of Physical Medicine and Rehabilitation
- Canadian Alliance to End Homelessness
- Canadian Housing First Toolkit
- Centre for Urban Health Solutions
- Cochrane Methods Equity Homeless Health Guidelines
- Evidence Exchange Network for Mental Health Addictions
- Mental Health Commission of Canada
- Model Systems Knowledge Translation Center
- National Association of State Head Injury
- National Health Care for the Homeless Council
- National Institute on Disability, Independent Living and Rehabilitation Research (NIDILRR)
- National Rehabilitation Information Center
- Ruff Institute of Global Homelessness

1  
2  
3  
4  
5  
6  
7  
8  
9  
10  
11  
12  
13  
14  
15  
16  
17  
18  
19  
20  
21  
22  
23  
24  
25  
26  
27  
28  
29  
30  
31  
32  
33  
34  
35  
36  
37  
38  
39  
40  
41  
42  
43  
44  
45  
46  
47  
48  
49  
50  
51  
52  
53  
54  
55  
56  
57  
58  
59  
60

- The Center for Brain Injury Research and Training
- The Homeless Hub
- Toronto Alliance to End Homelessness
- Toronto Mental Health and Addictions Supportive Housing Network
- Wellesley Institute

For peer review only

**PRISMA-P (Preferred Reporting Items for Systematic review and Meta-Analysis Protocols) 2015 checklist: recommended items to address in a systematic review protocol\***

| Section and topic                                       | Item No | Checklist item                                                                                                                                                                                                                |
|---------------------------------------------------------|---------|-------------------------------------------------------------------------------------------------------------------------------------------------------------------------------------------------------------------------------|
| <b>ADMINISTRATIVE INFORMATION</b>                       |         |                                                                                                                                                                                                                               |
| Title:                                                  |         |                                                                                                                                                                                                                               |
| Identification <b>PAGE 1 (SCOPING REVIEW)</b>           | 1a      | Identify the report as a protocol of a systematic review                                                                                                                                                                      |
| Update <b>N/A</b>                                       | 1b      | If the protocol is for an update of a previous systematic review, identify as such                                                                                                                                            |
| Registration <b>N/A</b>                                 | 2       | If registered, provide the name of the registry (such as PROSPERO) and registration number                                                                                                                                    |
| Authors:                                                |         |                                                                                                                                                                                                                               |
| Contact <b>PAGE 1</b>                                   | 3a      | Provide name, institutional affiliation, e-mail address of all protocol authors; provide physical mailing address of corresponding author                                                                                     |
| Contributions <b>PAGE 24</b>                            | 3b      | Describe contributions of protocol authors and identify the guarantor of the review                                                                                                                                           |
| Amendments <b>N?A</b>                                   | 4       | If the protocol represents an amendment of a previously completed or published protocol, identify as such and list changes; otherwise, state plan for documenting important protocol amendments                               |
| Support:                                                |         |                                                                                                                                                                                                                               |
| Sources <b>PAGE 24</b>                                  | 5a      | Indicate sources of financial or other support for the review                                                                                                                                                                 |
| Sponsor <b>PAGE 24</b>                                  | 5b      | Provide name for the review funder and/or sponsor                                                                                                                                                                             |
| Role of sponsor or funder <b>PAGE 24</b>                | 5c      | Describe roles of funder(s), sponsor(s), and/or institution(s), if any, in developing the protocol                                                                                                                            |
| <b>INTRODUCTION</b>                                     |         |                                                                                                                                                                                                                               |
| Rationale <b>PAGE 4-7</b>                               | 6       | Describe the rationale for the review in the context of what is already known                                                                                                                                                 |
| Objectives <b>PAGE 7</b>                                | 7       | Provide an explicit statement of the question(s) the review will address with reference to participants, interventions, comparators, and outcomes (PICO)                                                                      |
| <b>METHODS</b>                                          |         |                                                                                                                                                                                                                               |
| Eligibility criteria <b>PAGE 11-12</b>                  | 8       | Specify the study characteristics (such as PICO, study design, setting, time frame) and report characteristics (such as years considered, language, publication status) to be used as criteria for eligibility for the review |
| Information sources <b>PAGE 10-11</b>                   | 9       | Describe all intended information sources (such as electronic databases, contact with study authors, trial registers or other grey literature sources) with planned dates of coverage                                         |
| Search strategy <b>PAGE 10-11, SUPPLEMENTARY FILE 1</b> | 10      | Present draft of search strategy to be used for at least one electronic database, including planned limits, such that it could be repeated                                                                                    |

1  
2  
3  
4  
5  
6  
7  
8  
9  
10  
11  
12  
13  
14  
15  
16  
17  
18  
19  
20  
21  
22  
23  
24  
25  
26  
27  
28  
29  
30  
31  
32  
33  
34  
35  
36  
37  
38  
39  
40  
41  
42  
43  
44  
45  
46

---

|                                                   |     |                                                                                                                                                                                                                                                     |
|---------------------------------------------------|-----|-----------------------------------------------------------------------------------------------------------------------------------------------------------------------------------------------------------------------------------------------------|
| Study records:                                    |     |                                                                                                                                                                                                                                                     |
| Data management <b>PAGE 12</b>                    | 11a | Describe the mechanism(s) that will be used to manage records and data throughout the review                                                                                                                                                        |
| Selection process <b>PAGE 12</b>                  | 11b | State the process that will be used for selecting studies (such as two independent reviewers) through each phase of the review (that is, screening, eligibility and inclusion in meta-analysis)                                                     |
| Data collection process <b>PAGE 12-16</b>         | 11c | Describe planned method of extracting data from reports (such as piloting forms, done independently, in duplicate), any processes for obtaining and confirming data from investigators                                                              |
| Data items <b>PAGE 12-16</b>                      | 12  | List and define all variables for which data will be sought (such as PICO items, funding sources), any pre-planned data assumptions and simplifications                                                                                             |
| Outcomes and prioritization <b>PAGE 16-17</b>     | 13  | List and define all outcomes for which data will be sought, including prioritization of main and additional outcomes, with rationale                                                                                                                |
| Risk of bias in individual studies <b>PAGE 17</b> | 14  | Describe anticipated methods for assessing risk of bias of individual studies, including whether this will be done at the outcome or study level, or both; state how this information will be used in data synthesis                                |
| Data synthesis <b>PAGE 17</b>                     | 15a | Describe criteria under which study data will be quantitatively synthesised                                                                                                                                                                         |
| <b>PAGE 17</b>                                    | 15b | If data are appropriate for quantitative synthesis, describe planned summary measures, methods of handling data and methods of combining data from studies, including any planned exploration of consistency (such as I <sup>2</sup> , Kendall’s τ) |
| <b>N/A</b>                                        | 15c | Describe any proposed additional analyses (such as sensitivity or subgroup analyses, meta-regression)                                                                                                                                               |
| <b>PAGE 17</b>                                    | 15d | If quantitative synthesis is not appropriate, describe the type of summary planned                                                                                                                                                                  |
| Meta-bias(es) <b>N/A</b>                          | 16  | Specify any planned assessment of meta-bias(es) (such as publication bias across studies, selective reporting within studies)                                                                                                                       |
| Confidence in cumulative evidence <b>N/A</b>      | 17  | Describe how the strength of the body of evidence will be assessed (such as GRADE)                                                                                                                                                                  |

---

**\* It is strongly recommended that this checklist be read in conjunction with the PRISMA-P Explanation and Elaboration (cite when available) for important clarification on the items. Amendments to a review protocol should be tracked and dated. The copyright for PRISMA-P (including checklist) is held by the PRISMA-P Group and is distributed under a Creative Commons Attribution Licence 4.0.**

*From: Shamseer L, Moher D, Clarke M, Ghersi D, Liberati A, Petticrew M, Shekelle P, Stewart L, PRISMA-P Group. Preferred reporting items for systematic review and meta-analysis protocols (PRISMA-P) 2015: elaboration and explanation. BMJ. 2015 Jan 2;349(jan02 1):g7647.*
