# Supplementary material for: Protocol for a scoping review on rehabilitation among individuals who experience homelessness and traumatic brain injury
Source: HighWire-hosted journal article supplement (doi:10.1136/bmjopen-2021-052942), 2021-11-01
Supplement: bmjopen-2021-052942supp001_data_supplement.pdf [file bmjopen-2021-052942supp001_data_supplement.pdf]

## Supplementary File 1

### Search Description

This strategy was first developed in Medline, and was then translated to other databases. It uses the following concepts:

- Concept A (lines 1-15): Homelessness
- Concept B (lines 17-42): Rehabilitation
- Concept C (lines 44-55): Traumatic brain injury or cognitive impairment

The search conducted is: (A + B) OR (A + C). This strategy was used in all searched databases. Searches were also limited to human studies when possible. No date or language limits were applied.

### Search Strategy

Database: Ovid MEDLINE(R) ALL <1946 to April 20, 2021>

```
1  exp Homeless persons/
2  homeless*.tw,kf.
3  Roofless*.tw,kf.
4  (Marginal* adj3 hous*).tw,kf.
5  (precarious* adj3 hous*).tw,kf.
6  (unstabl* adj3 hous*).tw,kf.
7  (instab* adj3 hous*).tw,kf.
8  (interim* adj3 hous*).tw,kf.
9  (temporary adj3 (liv* or hous*)).tw,kf.
10 ((liv* or sleep* or stay or emergenc*) adj3 shelter??).tw,kf.
11 houseless*.tw,kf.
12 unsheltered.tw,kf.
13 rough sleeper?.tw,kf.
14 rough sleeping.tw,kf.
15 provisionally accommodat*.tw,kf.
16 or/1-15
17 "Physical and Rehabilitation Medicine"/
18 exp rehabilitation/
19 rehab*.tw,kf,jw.
20 telerehab*.tw,kf,jw.
21 neurorehab*.tw,kf,jw.
22 rh.fs.
23 Rehabilitation Centers/
24 (physiatrist? or physiatry).tw,kf.
25 occupational therapy/
26 (occupational adj therap*).tw,kf,jw.
27 physical therapy specialty/
28 (physical adj therap*).tw,kf,jw.
29 physiotherap*.tw,kf,jw.
30 physio-therapist*.tw,kf,jw.
31 Speech-Language Pathology/
32 (speech adj2 (therap* or patholog*)).tw,kf,jw.
33 Neuropsychology/
```

34 Neuropsycholog\*.tw,kf,jw.  
 35 Nutritionists/  
 36 (Nutritionist? or Dietician?).tw,kf,jw.  
 37 (therap\* adj recreation\*).tw,kf,jw.  
 38 child life specialist?.tw,kf.  
 39 play therapy/  
 40 (play adj therap\*).tw,kf.  
 41 Respite Care/  
 42 respite.tw,kf.  
 43 or/17-42  
 44 exp Brain Injuries/  
 45 exp Brain Injuries, Traumatic/  
 46 exp Brain Concussion/  
 47 Craniocerebral Trauma/  
 48 tbi\*2.tw,kf.  
 49 mtbi\*2.tw,kf.  
 50 concuss\*.tw,kf.  
 51 postconcuss\*.tw,kf.  
 52 ((head\* or brain\* or cerebr\* or crani\* or skull\* or intracran\*) adj2 (injur\* or trauma\* or damag\*  
 or wound\* or swell\* or oedema\* or edema\* or fracture\* or contusion\* or pressur\*)).tw,kf,jw.  
 53 ((brain\* or cerebr\* or intracerebr\* or crani\* or intracran\* or head\* or subdural\* or epidural\* or  
 extradural\*) adj (haematoma\* or hematoma\* or hemorrhag\* or haemorrhag\* or bleed\*)).tw,kf.  
 54 exp cognition disorders/  
 55 ((cogniti\* or neurocogniti\*) adj2 (impair\* or dysfunction\* or disorder\* or declin\*)).tw,kf.  
 56 or/44-55  
 57 16 and 43  
 58 16 and 56  
 59 57 or 58  
 60 59 not (exp animals/ not humans.sh.)

## Grey Literature

Reports from the following brain injury, housing, and rehabilitation organizations will be searched:

- American Academy of Physical Medicine and Rehabilitation
- Canadian Alliance to End Homelessness
- Canadian Housing First Toolkit
- Centre for Urban Health Solutions
- Cochrane Methods Equity Homeless Health Guidelines
- Evidence Exchange Network for Mental Health Addictions
- Mental Health Commission of Canada
- Model Systems Knowledge Translation Center
- National Association of State Head Injury
- National Health Care for the Homeless Council
- National Institute on Disability, Independent Living and Rehabilitation Research (NIDILRR)
- National Rehabilitation Information Center
- Ruff Institute of Global Homelessness

- The Center for Brain Injury Research and Training
- The Homeless Hub
- Toronto Alliance to End Homelessness
- Toronto Mental Health and Addictions Supportive Housing Network
- Wellesley Institute
